# Supplementary material for: Active transcription and Orc1 drive chromatin association of the AAA+ ATPase Pch2 during meiotic G2/prophase
Source: PLoS Genet. 2020 Jun 22;16(6):e1008905. doi: 10.1371/journal.pgen.1008905 (PMC7332104; doi:10.1371/journal.pgen.1008905)
Supplement: S4 Table — (XLSX) [file pgen.1008905.s016.xlsx]

## Sheet: Figure 3F
Figure 3F
	Mean (3 experiments)		Ratio	SD
	A.U. Pgk1	A.U. 3X-HA-Pch2	3X-HA-Pch2/Pgk1
	11861497	0	0	0
	10835572	0	0	0
	14654983	22121246	1.50947	0.021
	14612543	23631258	1.61719	0.038

## Sheet: Figure 5C
Figure 5C
	Mean (3 experiments)				Ratio	SD
Time in meiosis	A.U. Total Hop1	A.U. Phospho Hop1	A.U. Actin	A.U. HA	phospho Hop1/total Hop1	phospho Hop1/total Hop1
0	0	0	6154163	0	0	0
2	787556	0	8888083	0	0	0
4	3057820	1126062	7815619	2507435	0.321676	0.02344
5	4578134	983627	7415941	1459335	0.245965	0.07722
5.5	5332456	978971	6895305	4574719	0.183587	0.045511
6	6046690	841	8114326	4754234	0.000139084	2.13e-06
6.5	6093669	385	5897134	12902154	6.31803e-05	1.965e-05
7	6888477	799	4633669	8215962	0.000115991	5.64e-06
5.5	7684326	196	4884941	7363841	2.55065e-05	6.72e-06
6	8919497	92	6160761	10635912	1.03145e-05	9.88e-06
6.5	7488941	749	7828134	8576941	0.000100014	1.077e-05
7	6428456	556	5853477	5403506	8.64904e-05	1.099e-05

## Sheet: Figure 6D
Figure 6D
	Mean (3 experiments)		Ratio	SD
	A.U. Pgk1	A.U. 3X-HA-Pch2	3X-HA-Pch2/Pgk1
	19730690	15136770	0.767169	0.012
	18584397	0	0	0
	15060004	18193347	1.20806	0.0393
	12496882	25929761	2.0749	0.4582
	17691870	25594426	1.44668	0.1394

## Sheet: Supplementary Figure 1I
Supplementary Figure 1I
	Mean (3 experiments)		Ratio	SD
	A.U. Pgk1	A.U. 3XFLAG-Pch2	FLAG/Pgk1
	16616338	0	0
	17179409	21152953	1.2313	0.34176
	13739116	20904995	1.53962	0.15029
	22475811	9189376	0.930111	0.09705

## Sheet: Supplementary Figure 4C
Supplementary Figure 4C
		Mean (3 experiments)	Ratio	SD
	A.U. Pgk1	A.U. 3XFLAG-Pch2 E399Q	3X-FLAG-Pch2E399Q/Pgk1
	16409690	0	0	0
	14416016	0	0	0.018
	15674167	24575137	1.56788	0.063
	16576874	26948770	1.02243	0.021

## Sheet: Supplementary Figure 4E
Supplementary Figure 4E
	Mean (3 experiments)		Ratio
	A.U. Pgk1	A.U. FRB	FRB/actin	SD
	15735991	0	0	0
	20134317	34005	0.971123	0.098
	20712075	29581	1.14842	0.099
	16263225	0	0	0
	18763610	22311	1.00862	0.107
	15134418	14103	0.813738	0.054

## Sheet: Supplementary Figure 5E
Supplementary Figure 5E
	Mean (3 experiments)		Ratio	SD
	A.U. beta actin	A.U. 3XHA-Pch2	HA/Beta actin
	15988991	0	0	0
	16746033	3716974	0.221961	0.03613
	17921740	5561497	0.310321	0.02415
	15504619	7091052	0.457351	0.37093
	14513033	0	0	0
	15201861	2399075	0.157815	0.50835
	17269104	6903037	0.399733	0.01559
	16598861	8243495	0.49663	0.04485

## Sheet: Supplementary Figure 6D
Supplementary Figure 6D
	Mean (3 experiments)		Ratio
Time	A.U. Histone H2A	A.U. Orc1	Orc1/Histone H2A	SD
0	4082205	9455134	2.31618	0.4931
2	5942368	8894231	1.49675	1.4072
3	6756820	10211892	1.51135	0.6528
4	4927134	7337790	1.48926	0.9312
0	4077355	17992912	4.41289	0.9655
2	4253296	19516263	4.5885	1.0072
3	5953284	33646104	5.65169	0.4626
4	4987882	5967284	1.19636	0.9444
0	4840255	15220175	3.1445	0.9094
2	3982506	17918468	4.49929	0.7063
3	4188385	19516263	4.65962	0.7552
4	5233987	12438932	2.37657	0.6783
