# Supplementary material for: Active transcription and Orc1 drive chromatin association of the AAA+ ATPase Pch2 during meiotic G2/prophase
Source: PLoS Genet. 2020 Jun 22;16(6):e1008905. doi: 10.1371/journal.pgen.1008905 (PMC7332104; doi:10.1371/journal.pgen.1008905)
Supplement: S5 Table — (XLSX) [file pgen.1008905.s017.xlsx]

## Sheet: Sheet1
Gene	Chromosome	Region	Log₂ fold change	Fold change	P-value
YAR068W	I	222406,,222891	0.69	1.61	0.11
MST28	I	188107,,188811	0.61	1.52	0.44
YAL044W-A	I	57518,,57850	0.55	1.46	0.51
POP5	I	82706,,83227	0.38	1.3	0.65
FUN19	I	complement(80710,,81951)	0.32	1.25	0.34
YAL065C	I	complement(11565,,11951)	0.27	1.2	0.79
PHO11	I	225460,,226863	0.27	1.21	0.59
YAL019W-A	I	114250,,114819	0.25	1.19	0.88
YAL004W	I	140760,,141407	0.25	1.19	0.88
YAL026C-A	I	complement(95386,,95823)	0.24	1.18	0.59
LDS1	I	complement(118564,,119541)	0.24	1.18	0.38
SWD1	I	155005,,156285	0.22	1.17	0.5
TFC3	I	complement(147594,,151166)	0.2	1.14	0.37
TPD3	I	124879,,126786	0.19	1.14	0.36
YAR066W	I	221049,,221660	0.17	1.12	0.47
ERP1	I	complement(154065,,154724)	0.17	1.13	0.55
CDC19	I	71786,,73288	0.16	1.12	0.56
UIP3	I	183770,,184477	0.16	1.12	0.58
AIM1	I	complement(57029,,57385)	0.15	1.11	0.86
SYN8	I	complement(128252,,129019)	0.14	1.1	0.62
SEN34	I	158966,,159793	0.14	1.1	0.75
CDC15	I	complement(172211,,175135)	0.13	1.09	0.57
CLN3	I	complement(65778,,67520)	0.12	1.09	0.74
FUN14	I	136914,,137510	0.1	1.07	0.72
RFA1	I	complement(156754,,158619)	0.1	1.07	0.62
CNE1	I	37464,,38972	0.1	1.07	0.77
BUD14	I	complement(166742,,168871)	0.1	1.07	0.59
BDH2	I	33448,,34701	0.09	1.06	0.75
GEM1	I	complement(52801,,54789)	0.08	1.06	0.71
GDH3	I	31567,,32940	0.06	1.04	0.82
PSK1	I	120225,,124295	0.06	1.04	0.78
VPS8	I	143707,,147531	0.06	1.04	0.84
BDH1	I	35155,,36303	0.06	1.04	0.83
RBG1	I	complement(75043,,76152)	0.06	1.05	0.81
NUP60	I	152257,,153876	0.04	1.03	0.88
PTA1	I	complement(58695,,61052)	0.04	1.03	0.9
OAF1	I	48564,,51707	0.03	1.02	0.86
SWH1	I	192619,,196185	0.03	1.02	0.85
FLO9	I	complement(24000,,27968)	0.02	1.01	0.93
ADE1	I	169375,,170295	0.02	1.01	0.94
YAR023C	I	complement(179281,,179820)	0.02	1.02	0.95
EFB1	I	142174,,143160	0.01	1.01	0.94
YAR009C	I	complement(160597,,164187)	0.01	1.01	0.99
DEP1	I	129270,,130487	0.00874	1.01	0.96
AIM2	I	complement(51855,,52595)	0.0075	1.01	0.98
MYO4	I	complement(87855,,92270)	0.00178	1	0.99
YAT1	I	190193,,192256	-0.00481	-1	0.98
PMT2	I	complement(106272,,108551)	-0.00495	-1	0.98
SEO1	I	complement(7235,,9016)	-0.0074	-1.01	0.98
FLC2	I	45899,,48250	-0.00874	-1.01	0.96
LTE1	I	complement(101565,,105872)	-0.00921	-1.01	0.96
PRP45	I	complement(83335,,84474)	-0.01	-1.01	0.96
MDM10	I	complement(134184,,135665)	-0.02	-1.02	0.94
MTW1	I	79718,,80587	-0.02	-1.01	0.97
ERV46	I	61316,,62563	-0.02	-1.01	0.92
DRS2	I	complement(95630,,99697)	-0.02	-1.01	0.92
ACS1	I	complement(42881,,45022)	-0.02	-1.01	0.94
FUN12	I	76427,,79435	-0.03	-1.02	0.84
MAK16	I	complement(100225,,101145)	-0.04	-1.03	0.92
SAW1	I	94687,,95472	-0.04	-1.03	0.9
FUN30	I	114919,,118314	-0.04	-1.02	0.85
GIP4	I	complement(84749,,87031)	-0.05	-1.04	0.86
SSA1	I	complement(139503,,141431)	-0.05	-1.03	0.87
GCV3	I	complement(57950,,58462)	-0.06	-1.04	0.87
GPB2	I	39259,,41901	-0.06	-1.04	0.74
ECM1	I	36509,,37147	-0.07	-1.05	0.84
CDC24	I	62840,,65404	-0.07	-1.05	0.68
YAL064W-B	I	12046,,12426	-0.07	-1.05	0.93
SPC72	I	complement(54989,,56857)	-0.09	-1.06	0.74
YAL037W	I	74020,,74823	-0.1	-1.08	0.88
CYS3	I	130799,,131983	-0.1	-1.07	0.61
FLO1	I	203403,,208016	-0.1	-1.07	0.78
ERP2	I	complement(137698,,138345)	-0.11	-1.08	0.73
SWC3	I	132199,,134076	-0.13	-1.09	0.63
CCR4	I	complement(110846,,113359)	-0.13	-1.09	0.47
YAL042C-A	I	complement(61231,,61608)	-0.13	-1.09	0.92
PEX22	I	42177,,42719	-0.14	-1.1	0.85
NTG1	I	complement(126903,,128102)	-0.14	-1.1	0.77
FRT2	I	92900,,94486	-0.17	-1.13	0.54
CYC3	I	complement(68716,,69525)	-0.17	-1.12	0.55
SNC1	I	87286,,87752	-0.18	-1.13	0.63
ATS1	I	complement(113614,,114615)	-0.23	-1.17	0.47
KIN3	I	complement(170396,,171703)	-0.26	-1.2	0.73
YAR029W	I	186321,,186545	-0.29	-1.23	0.81
SPO7	I	135854,,136633	-0.3	-1.23	0.56
FUN26	I	complement(108877,,110430)	-0.32	-1.25	0.44
IMD1	I	227742,,228953	-0.4	-1.32	0.64
YAR028W	I	184892,,185596	-0.45	-1.36	0.46
YAL068W-A	I	538,,792	-0.61	-1.52	0.75
YAL037C-B	I	complement(72326,,73300)	-0.66	-1.58	0.67
YAR060C	I	complement(217157,,217492)	-0.66	-1.58	0.67
YAR075W	I	228844,,229317	-0.66	-1.58	0.67
YAL069W	I	335,,649	-0.68	-1.61	0.62
PRM9	I	186836,,187732	-0.68	-1.61	0.62
YBR126W-A	II	490850,,491056	1.53	2.89	0.36
YBR230W-A	II	680362,,680562	1.53	2.89	0.36
CBP6	II	complement(480435,,480923)	0.83	1.78	0.46
YBR277C	II	complement(760215,,760616)	0.78	1.72	0.64
YBR012W-B	II	259869,,265140	0.75	1.69	0.24
MBA1	II	complement(599123,,599959)	0.63	1.54	0.12
YBR056W-A	II	351255,,351455	0.57	1.48	0.67
GPX2	II	707528,,708016	0.51	1.43	0.37
YBR116C	II	complement(474199,,474726)	0.51	1.43	0.1
FUS3	II	192451,,193512	0.48	1.39	0.68
PRX1	II	complement(100371,,101156)	0.42	1.34	0.18
TKL2	II	complement(474392,,476437)	0.41	1.33	0.21
FUR4	II	281443,,283344	0.37	1.29	0.26
FMP23	II	331833,,332360	0.35	1.27	0.64
CMC2	II	complement(110125,,110539)	0.33	1.25	0.59
FMT1	II	202056,,203261	0.33	1.26	0.3
RRT1	II	127299,,127610	0.31	1.24	0.55
YBR085C-A	II	complement(418907,,419164)	0.29	1.22	0.23
PHO89	II	complement(796798,,798522)	0.29	1.23	0.34
YSY6	II	565231,,565428	0.27	1.2	0.75
MAL32	II	805351,,807105	0.27	1.21	0.42
MIC12	II	complement(735720,,736040)	0.27	1.21	0.69
YBR076C-A	II	complement(391351,,391617)	0.27	1.21	0.71
APE3	II	774700,,776313	0.26	1.2	0.28
YBL065W	II	99963,,100307	0.26	1.2	0.85
YBR099C	II	complement(442924,,443307)	0.26	1.2	0.41
GPI18	II	complement(244366,,245667)	0.24	1.18	0.42
ETR1	II	complement(292877,,294019)	0.23	1.17	0.35
SUL1	II	789235,,791814	0.23	1.17	0.48
MAL33	II	800523,,801929	0.22	1.16	0.37
SSA3	II	complement(84499,,86448)	0.22	1.16	0.48
YPT10	II	complement(737770,,738369)	0.21	1.16	0.57
ECM21	II	complement(24946,,28299)	0.2	1.15	0.38
IFA38	II	558685,,559728	0.2	1.15	0.34
CMD1	II	complement(457919,,458362)	0.2	1.15	0.38
SAF1	II	complement(762784,,764697)	0.2	1.15	0.33
FIG1	II	316968,,317864	0.19	1.14	0.62
OM14	II	complement(679549,,680050)	0.18	1.14	0.3
YBR063C	II	complement(366970,,368184)	0.17	1.13	0.44
ALG14	II	complement(379221,,379934)	0.17	1.13	0.57
YBL095W	II	43277,,44089	0.16	1.12	0.55
CDC27	II	complement(67169,,69445)	0.16	1.12	0.48
AAR2	II	complement(86722,,87789)	0.16	1.12	0.67
ZTA1	II	complement(330507,,331511)	0.15	1.11	0.51
PDB1	II	complement(665153,,666253)	0.15	1.11	0.47
YMC2	II	449667,,450656	0.15	1.11	0.74
GRX7	II	complement(266725,,267336)	0.15	1.11	0.62
YBR206W	II	634601,,634924	0.15	1.11	0.86
RFT1	II	182401,,184125	0.14	1.1	0.47
YBR285W	II	773922,,774356	0.14	1.1	0.6
SLM4	II	complement(391805,,392293)	0.14	1.1	0.62
SCS22	II	complement(46565,,47180)	0.13	1.09	0.65
MRPL16	II	146187,,146885	0.13	1.09	0.53
GRS1	II	complement(481364,,483367)	0.13	1.09	0.56
YBL055C	II	complement(115573,,116829)	0.13	1.1	0.56
BNA4	II	39145,,40527	0.12	1.08	0.63
RIB5	II	complement(727386,,728102)	0.12	1.08	0.59
TPS1	II	complement(488905,,490392)	0.12	1.08	0.6
YBR284W	II	771239,,773632	0.12	1.08	0.68
SLI15	II	complement(551104,,553200)	0.12	1.09	0.56
IPP1	II	complement(257112,,257975)	0.12	1.09	0.57
ATP1	II	37053,,38690	0.12	1.09	0.63
NTC20	II	complement(603685,,604107)	0.12	1.09	0.76
POP8	II	complement(185998,,186474)	0.12	1.09	0.86
NGR1	II	647886,,649904	0.11	1.08	0.58
RPL19B	II	168423,,169376	0.11	1.08	0.57
SPO23	II	719033,,720604	0.11	1.08	0.57
YBR184W	II	597363,,598934	0.11	1.08	0.57
PCS60	II	complement(666720,,668351)	0.11	1.08	0.73
HMT1	II	complement(304930,,305976)	0.11	1.08	0.71
RRN6	II	complement(199064,,201748)	0.11	1.08	0.62
TCM62	II	complement(324341,,326059)	0.11	1.08	0.78
YBL086C	II	complement(61202,,62602)	0.1	1.07	0.56
YBR090C	II	complement(426333,,427058)	0.1	1.07	0.81
PRE7	II	141247,,141972	0.1	1.07	0.6
SEC66	II	578364,,578984	0.1	1.07	0.73
COR1	II	complement(134143,,135516)	0.1	1.07	0.59
PGI1	II	complement(612236,,613900)	0.1	1.07	0.66
YBR062C	II	complement(365976,,366600)	0.1	1.07	0.68
TEF2	II	477671,,479047	0.1	1.07	0.74
SDH8	II	complement(742160,,742576)	0.1	1.07	0.64
RAD16	II	467248,,469620	0.1	1.07	0.75
IRA1	II	complement(517350,,526628)	0.09	1.06	0.7
YBR138C	II	complement(513762,,515336)	0.09	1.06	0.75
APL3	II	147209,,150286	0.09	1.06	0.61
GIP1	II	complement(328173,,330092)	0.09	1.06	0.66
ATP3	II	315575,,316510	0.09	1.06	0.59
AIM3	II	454822,,457665	0.09	1.06	0.77
HSL7	II	complement(501804,,504287)	0.09	1.07	0.65
RDH54	II	383112,,385988	0.09	1.07	0.64
TEC1	II	409169,,410629	0.09	1.07	0.78
POP4	II	728885,,729724	0.09	1.07	0.6
SSH1	II	complement(768943,,770415)	0.09	1.07	0.65
PBY1	II	432036,,434297	0.09	1.07	0.63
SKT5	II	complement(105316,,107406)	0.08	1.05	0.7
PDX3	II	complement(306269,,306955)	0.08	1.05	0.68
PCA1	II	792849,,796499	0.08	1.06	0.7
SSE2	II	complement(573915,,575996)	0.08	1.06	0.77
RPS11B	II	332831,,333812	0.08	1.06	0.65
DUG2	II	complement(764970,,767606)	0.08	1.06	0.78
MET8	II	650368,,651192	0.08	1.06	0.85
ARO4	II	complement(716882,,717994)	0.08	1.06	0.7
CKS1	II	504854,,505306	0.08	1.06	0.78
CDC28	II	560078,,560974	0.08	1.06	0.71
ECM2	II	complement(368584,,369678)	0.07	1.05	0.7
YBR139W	II	515664,,517190	0.07	1.05	0.81
FZO1	II	complement(586547,,589114)	0.07	1.05	0.69
OLA1	II	complement(290681,,291865)	0.07	1.05	0.65
NTH2	II	complement(238941,,241283)	0.07	1.05	0.72
UBP13	II	complement(93639,,95882)	0.07	1.05	0.68
DUR1,2	II	complement(636703,,642210)	0.07	1.05	0.74
YSW1	II	537876,,539705	0.07	1.05	0.69
PRP5	II	691969,,694518	0.07	1.05	0.73
GDT1	II	602634,,603476	0.07	1.05	0.73
TAE1	II	complement(734832,,735530)	0.07	1.05	0.91
MEC1	II	505668,,512774	0.07	1.05	0.75
ORC2	II	complement(360652,,362514)	0.07	1.05	0.72
PHO3	II	complement(427698,,429101)	0.06	1.04	0.9
ALG3	II	complement(69751,,71127)	0.06	1.04	0.82
YPC1	II	596115,,597065	0.06	1.04	0.83
HPC2	II	653356,,655317	0.06	1.04	0.78
ABD1	II	complement(690383,,691693)	0.06	1.04	0.76
SHP1	II	111437,,112708	0.06	1.04	0.77
PKC1	II	complement(14241,,17696)	0.06	1.04	0.79
ARC40	II	complement(685438,,686592)	0.06	1.04	0.78
YBR056W	II	347879,,349384	0.06	1.04	0.85
RPS8A	II	complement(88523,,89125)	0.06	1.05	0.83
RPL19A	II	complement(414186,,415261)	0.05	1.03	0.87
RPL32	II	45978,,46370	0.05	1.03	0.8
MRPS9	II	535260,,536096	0.05	1.03	0.85
TOD6	II	117589,,119166	0.05	1.03	0.83
UMP1	II	complement(581726,,582172)	0.05	1.04	0.86
YBR137W	II	513044,,513583	0.05	1.04	0.84
BSD2	II	782591,,783556	0.05	1.04	0.79
CSH1	II	561634,,562764	0.05	1.04	0.84
TIM12	II	complement(427155,,427484)	0.05	1.04	0.95
VMA2	II	complement(491269,,492822)	0.05	1.04	0.76
KTR3	II	633622,,634836	0.04	1.02	0.91
SRO77	II	complement(10847,,13879)	0.04	1.03	0.8
SDS24	II	651415,,652998	0.04	1.03	0.8
SWD3	II	582408,,583355	0.04	1.03	0.92
EDS1	II	301944,,304703	0.04	1.03	0.85
YBR197C	II	complement(615203,,615856)	0.04	1.03	0.89
PTH2	II	complement(112801,,113427)	0.04	1.03	0.89
KIP1	II	101886,,105221	0.04	1.03	0.83
RPS6B	II	complement(591712,,592774)	0.04	1.03	0.85
APM3	II	complement(778012,,779463)	0.04	1.03	0.89
MNN2	II	complement(267710,,269503)	0.04	1.03	0.86
UBS1	II	568852,,569685	0.04	1.03	0.86
PPS1	II	complement(757620,,760043)	0.04	1.03	0.86
RRN10	II	171481,,171918	0.03	1.02	0.92
SUP45	II	complement(530869,,532182)	0.03	1.02	0.91
RFC5	II	423765,,424829	0.03	1.02	0.93
EDE1	II	complement(127895,,132040)	0.03	1.02	0.87
SLA1	II	complement(212632,,216366)	0.03	1.02	0.88
RIB1	II	complement(158656,,159693)	0.03	1.02	0.86
CSG2	II	complement(309081,,310313)	0.03	1.02	0.92
BIT2	II	complement(742761,,744398)	0.03	1.02	0.91
REI1	II	739841,,741022	0.03	1.02	0.88
HSP26	II	382030,,382674	0.03	1.02	0.89
YRO2	II	343101,,344135	0.03	1.02	0.91
PDR3	II	217470,,220400	0.03	1.02	0.91
YBR287W	II	776571,,777854	0.03	1.02	0.9
TSC10	II	738582,,739544	0.02	1.01	0.94
YBR053C	II	complement(339675,,340751)	0.02	1.01	0.92
BOI1	II	63876,,66818	0.02	1.01	0.92
MUD1	II	479338,,480323	0.02	1.01	0.91
FAT1	II	318266,,320275	0.02	1.01	0.92
SEA4	II	complement(18177,,21293)	0.02	1.01	0.93
YBL029C-A	II	complement(164488,,164772)	0.02	1.02	0.94
SEF1	II	complement(96669,,100115)	0.02	1.02	0.88
GAL1	II	279021,,280607	0.02	1.02	0.93
TEL1	II	complement(51019,,59382)	0.02	1.02	0.91
AKL1	II	complement(356861,,360187)	0.01	1.01	0.93
MAP2	II	complement(47363,,48628)	0.01	1.01	0.94
ALG1	II	458872,,460221	0.01	1.01	0.95
MAL31	II	complement(802631,,804475)	0.01	1.01	0.96
QDR3	II	complement(321876,,323945)	0.01	1.01	0.95
YBR012C	II	complement(259147,,259566)	0.01	1.01	0.99
SMP1	II	complement(593506,,594864)	0.01	1.01	0.99
PRS4	II	92414,,93394	0.00989	1.01	0.97
SPT7	II	complement(401253,,405251)	0.00863	1.01	0.96
PYC2	II	complement(658707,,662249)	0.00852	1.01	0.97
PIN4	II	complement(122753,,124759)	0.00749	1.01	0.97
NHP6B	II	complement(426190,,426489)	0.0073	1.01	0.97
YBR225W	II	670627,,673329	0.00669	1	0.97
PFF1	II	386286,,389216	0.00635	1	0.97
RCR1	II	245906,,246547	0.0043	1	0.98
PAF1	II	761257,,762594	0.00377	1	0.98
UBP14	II	complement(353672,,356017)	0.00184	1	0.99
ECM33	II	393123,,394742	0.000507	1	1
PIM1	II	complement(177874,,181275)	-0.00202	-1	0.99
STU1	II	complement(153848,,158389)	-0.00236	-1	0.99
DPB3	II	760294,,760899	-0.00387	-1	0.99
CHS3	II	complement(284428,,287925)	-0.00493	-1	0.98
YBL029W	II	166134,,167264	-0.00534	-1	0.98
THI2	II	complement(700490,,701842)	-0.0056	-1	0.99
SWC5	II	complement(682179,,683090)	-0.00589	-1	0.97
DTR1	II	589741,,591459	-0.00811	-1.01	0.97
ACH1	II	194122,,195702	-0.00837	-1.01	0.97
SHM1	II	736264,,737736	-0.00961	-1.01	0.96
PTC3	II	113762,,115168	-0.01	-1.01	0.95
RTG3	II	complement(22076,,23536)	-0.01	-1.01	0.95
HIS7	II	complement(714807,,716465)	-0.01	-1.01	0.97
KTR4	II	618909,,620303	-0.01	-1.01	0.97
ISW1	II	complement(708150,,711539)	-0.01	-1.01	0.95
PHO88	II	452658,,453224	-0.01	-1.01	0.95
UBX7	II	complement(748061,,749371)	-0.01	-1.01	0.95
MSI1	II	complement(610614,,611882)	-0.02	-1.02	0.94
VHC1	II	686901,,690263	-0.02	-1.02	0.94
MUM2	II	complement(352193,,353293)	-0.02	-1.02	0.89
RFS1	II	complement(338720,,339352)	-0.02	-1.01	0.95
COS111	II	629168,,631942	-0.02	-1.01	0.92
RPL23A	II	complement(59822,,60739)	-0.02	-1.01	0.93
SPP381	II	546376,,547251	-0.02	-1.01	0.95
REB1	II	complement(334386,,336818)	-0.02	-1.01	0.95
ECM8	II	390227,,391291	-0.02	-1.01	0.94
FES1	II	complement(443821,,444693)	-0.02	-1.01	0.92
RPS9B	II	604508,,605508	-0.03	-1.02	0.89
RGD1	II	complement(732639,,734639)	-0.03	-1.02	0.89
NUP170	II	75259,,79767	-0.03	-1.02	0.87
IST2	II	complement(420201,,423041)	-0.03	-1.02	0.87
SIF2	II	447709,,449316	-0.03	-1.02	0.88
APD1	II	545028,,545978	-0.03	-1.02	0.85
COQ1	II	242809,,244230	-0.03	-1.02	0.92
AGP2	II	complement(499652,,501442)	-0.03	-1.02	0.86
TIP1	II	complement(372103,,372735)	-0.03	-1.02	0.83
PTC4	II	complement(487199,,488380)	-0.03	-1.02	0.91
CST26	II	complement(320416,,321609)	-0.03	-1.02	0.91
FTH1	II	635146,,636543	-0.03	-1.02	0.87
CYC8	II	complement(462870,,465770)	-0.03	-1.02	0.9
BRN1	II	40831,,43095	-0.03	-1.02	0.86
SEC17	II	125125,,126119	-0.04	-1.03	0.85
LYS2	II	complement(469748,,473926)	-0.04	-1.03	0.82
RPG1	II	complement(395383,,398277)	-0.04	-1.03	0.84
YBL083C	II	complement(69713,,70138)	-0.04	-1.03	0.94
PBP2	II	683428,,684669	-0.04	-1.03	0.85
PET112	II	complement(73070,,74695)	-0.04	-1.03	0.88
HIR1	II	209653,,212175	-0.04	-1.03	0.89
RIF1	II	complement(751356,,757106)	-0.04	-1.03	0.85
SCO2	II	289445,,290350	-0.04	-1.03	0.85
SNF5	II	779667,,782384	-0.04	-1.03	0.82
FLR1	II	complement(252563,,254209)	-0.04	-1.03	0.88
OPY1	II	complement(494353,,495339)	-0.04	-1.03	0.87
RPL21A	II	606270,,607140	-0.04	-1.03	0.86
ILS1	II	complement(81043,,84261)	-0.04	-1.02	0.84
PSY4	II	132424,,133749	-0.05	-1.04	0.78
RPB5	II	complement(548362,,549009)	-0.05	-1.04	0.86
HSM3	II	complement(746361,,747803)	-0.05	-1.04	0.83
SLX1	II	675313,,676227	-0.05	-1.04	0.87
UGA2	II	247010,,248503	-0.05	-1.04	0.84
SCT1	II	203538,,205817	-0.05	-1.04	0.75
POP7	II	complement(571468,,571890)	-0.05	-1.03	0.89
YBR201C-A	II	complement(624493,,624696)	-0.05	-1.03	0.96
VPS15	II	436951,,441315	-0.05	-1.03	0.83
LDH1	II	complement(632254,,633381)	-0.05	-1.03	0.84
YBL113C	II	complement(280,,2658)	-0.05	-1.03	0.8
ENP1	II	complement(713004,,714455)	-0.06	-1.05	0.82
KAP104	II	complement(270947,,273703)	-0.06	-1.05	0.77
YBR242W	II	704670,,705386	-0.06	-1.04	0.82
VBA2	II	787006,,788430	-0.06	-1.04	0.86
GAL7	II	complement(274427,,275527)	-0.06	-1.04	0.9
TDP1	II	complement(668663,,670297)	-0.06	-1.04	0.83
ROX3	II	complement(44256,,44918)	-0.06	-1.04	0.84
ALG7	II	complement(705447,,706793)	-0.06	-1.04	0.82
TAF5	II	complement(616127,,618523)	-0.06	-1.04	0.77
TRM7	II	complement(364787,,365719)	-0.06	-1.04	0.86
SMY2	II	complement(579150,,581372)	-0.06	-1.04	0.77
PRP6	II	complement(344602,,347301)	-0.06	-1.04	0.76
ARL1	II	complement(567875,,568426)	-0.06	-1.04	0.86
UTP20	II	227636,,235117	-0.07	-1.05	0.73
POL30	II	complement(424990,,425766)	-0.07	-1.05	0.86
APN2	II	184353,,185915	-0.07	-1.05	0.81
BMT2	II	complement(527025,,528038)	-0.07	-1.05	0.85
YBR259W	II	730387,,732453	-0.07	-1.05	0.78
ERT1	II	complement(698354,,699943)	-0.07	-1.05	0.8
HEK2	II	160184,,161329	-0.07	-1.05	0.77
MMS4	II	441515,,443590	-0.07	-1.05	0.77
FUI1	II	complement(138341,,140260)	-0.07	-1.05	0.72
SRB6	II	723270,,723635	-0.07	-1.05	0.84
ECM13	II	136688,,137461	-0.07	-1.05	0.72
CCZ1	II	497163,,499277	-0.07	-1.05	0.76
HHT1	II	256331,,256741	-0.08	-1.06	0.68
VID24	II	complement(450881,,451969)	-0.08	-1.06	0.71
YBP1	II	complement(655576,,657600)	-0.08	-1.06	0.71
POL12	II	complement(151493,,153610)	-0.08	-1.06	0.71
CTP1	II	complement(783673,,784572)	-0.08	-1.06	0.85
NPL4	II	complement(576344,,578086)	-0.08	-1.06	0.72
HTA2	II	complement(235394,,235792)	-0.08	-1.06	0.76
ERD2	II	complement(142112,,142868)	-0.08	-1.06	0.72
PEP1	II	complement(186844,,191583)	-0.08	-1.06	0.7
TFC1	II	complement(484742,,486691)	-0.08	-1.06	0.68
SHE3	II	complement(495592,,496869)	-0.08	-1.06	0.74
DER1	II	623576,,624211	-0.08	-1.05	0.86
ICS2	II	complement(553543,,554310)	-0.08	-1.05	0.84
PET9	II	complement(163041,,163997)	-0.08	-1.05	0.7
YBR255C-A	II	complement(726618,,727074)	-0.09	-1.07	0.8
SEC18	II	complement(398614,,400890)	-0.09	-1.07	0.76
MAK5	II	528317,,530638	-0.09	-1.06	0.7
REG2	II	complement(337183,,338199)	-0.09	-1.06	0.75
EHT1	II	complement(584807,,586162)	-0.09	-1.06	0.67
EXO84	II	complement(445062,,447323)	-0.09	-1.06	0.68
CHK1	II	749594,,751177	-0.09	-1.06	0.69
TYR1	II	complement(569842,,571200)	-0.1	-1.07	0.71
RKM3	II	298292,,299950	-0.1	-1.07	0.76
MTC4	II	724456,,726540	-0.1	-1.07	0.65
YPK3	II	complement(294425,,296002)	-0.1	-1.07	0.78
ALK2	II	207194,,209224	-0.1	-1.07	0.7
ARA1	II	539987,,541021	-0.1	-1.07	0.61
MRPL27	II	768240,,768680	-0.11	-1.08	0.81
NCL1	II	172534,,174588	-0.11	-1.08	0.67
MCM2	II	complement(174920,,177526)	-0.11	-1.08	0.62
YBL036C	II	complement(150447,,151220)	-0.11	-1.08	0.67
MRPS5	II	721390,,722313	-0.11	-1.08	0.71
AVT5	II	49574,,50953	-0.12	-1.09	0.74
UBC4	II	complement(406628,,407169)	-0.12	-1.09	0.49
YBR071W	II	380411,,381046	-0.12	-1.08	0.68
MED8	II	complement(609082,,609753)	-0.13	-1.1	0.66
RTC2	II	536575,,537465	-0.13	-1.1	0.61
LDB7	II	complement(216587,,217129)	-0.13	-1.09	0.63
RRT2	II	711591,,712754	-0.13	-1.09	0.78
MCX1	II	complement(673572,,675134)	-0.13	-1.09	0.66
RER2	II	complement(241708,,242568)	-0.13	-1.09	0.65
SAS3	II	complement(119379,,121874)	-0.13	-1.09	0.65
MCM7	II	625772,,628309	-0.13	-1.09	0.6
YBR292C	II	complement(784702,,785073)	-0.13	-1.09	0.92
YSA1	II	complement(461178,,461873)	-0.13	-1.09	0.56
YBR220C	II	complement(662995,,664677)	-0.14	-1.1	0.69
DAD3	II	684977,,685261	-0.14	-1.1	0.9
AIM4	II	610038,,610409	-0.14	-1.1	0.85
CHS2	II	311898,,314789	-0.14	-1.1	0.85
ATG8	II	complement(80378,,80731)	-0.14	-1.1	0.61
MIX23	II	complement(9961,,10551)	-0.14	-1.1	0.67
RPL4A	II	300166,,301254	-0.14	-1.1	0.51
MOH1	II	126828,,127244	-0.15	-1.11	0.56
BEM1	II	620872,,622527	-0.15	-1.11	0.58
ROT2	II	complement(676357,,679221)	-0.15	-1.11	0.52
SFT2	II	24098,,24745	-0.15	-1.11	0.54
HHF1	II	complement(255373,,255684)	-0.15	-1.11	0.6
MRP21	II	48825,,49358	-0.15	-1.11	0.68
PHO5	II	complement(429548,,430951)	-0.16	-1.12	0.62
HTB2	II	236492,,236887	-0.16	-1.12	0.57
TSC3	II	complement(356324,,356566)	-0.16	-1.12	0.66
EXO5	II	565723,,567480	-0.16	-1.12	0.66
YEL1	II	107932,,109995	-0.16	-1.12	0.58
MIS1	II	411054,,413981	-0.17	-1.13	0.58
AST1	II	90741,,92030	-0.17	-1.13	0.51
BAP2	II	complement(373861,,375690)	-0.17	-1.12	0.51
TOS1	II	complement(563203,,564570)	-0.17	-1.12	0.49
YBL081W	II	71866,,72972	-0.18	-1.13	0.62
AME1	II	complement(646158,,647132)	-0.18	-1.13	0.64
DSF2	II	complement(248806,,251016)	-0.18	-1.13	0.46
SCO1	II	complement(310565,,311452)	-0.18	-1.13	0.58
CNS1	II	549771,,550928	-0.19	-1.14	0.55
YBR238C	II	complement(695107,,697302)	-0.19	-1.14	0.42
RIM2	II	607652,,608785	-0.19	-1.14	0.61
TAT1	II	complement(376574,,378433)	-0.2	-1.15	0.4
LSM2	II	170623,,171038	-0.2	-1.15	0.61
YBR016W	II	270247,,270633	-0.2	-1.15	0.52
TBS1	II	complement(541209,,544493)	-0.2	-1.15	0.39
NRG2	II	complement(370037,,370699)	-0.21	-1.16	0.58
IML3	II	complement(453793,,454530)	-0.21	-1.16	0.54
YBL010C	II	complement(206107,,206949)	-0.21	-1.16	0.58
RXT2	II	complement(434406,,435698)	-0.21	-1.16	0.41
URA7	II	complement(143989,,145728)	-0.21	-1.16	0.35
ATG12	II	657832,,658392	-0.21	-1.15	0.58
YBL100W-B	II	29935,,35248	-0.22	-1.17	0.75
AMN1	II	556549,,558198	-0.22	-1.17	0.62
RIB7	II	547460,,548194	-0.22	-1.16	0.46
SHE1	II	161699,,162715	-0.22	-1.16	0.65
YBL094C	II	complement(43765,,44097)	-0.23	-1.18	0.81
YBR096W	II	436021,,436713	-0.23	-1.17	0.58
ADH5	II	533762,,534817	-0.23	-1.17	0.55
YBR013C	II	complement(265492,,265881)	-0.23	-1.17	0.69
YBR241C	II	complement(702589,,704055)	-0.24	-1.19	0.31
ATG14	II	complement(493081,,494115)	-0.26	-1.2	0.52
MRPL36	II	complement(483970,,484503)	-0.26	-1.19	0.41
GAL10	II	complement(276253,,278352)	-0.29	-1.23	0.81
YBL059W	II	110594,,111244	-0.29	-1.22	0.62
AAC3	II	415983,,416906	-0.29	-1.22	0.62
ECM31	II	583720,,584658	-0.29	-1.22	0.63
ECM15	II	complement(237153,,237467)	-0.31	-1.24	0.69
POA1	II	283738,,284271	-0.31	-1.24	0.64
CDS1	II	complement(296369,,297742)	-0.33	-1.26	0.33
KTI11	II	89978,,90226	-0.36	-1.28	0.69
YBL005W-A	II	221330,,222652	-0.36	-1.28	0.51
EFM2	II	744852,,746111	-0.37	-1.3	0.38
PEX32	II	572371,,573612	-0.4	-1.32	0.41
ERV15	II	645550,,645978	-0.4	-1.32	0.64
SUS1	II	462139,,462579	-0.4	-1.32	0.61
HAP3	II	complement(181660,,182094)	-0.41	-1.33	0.37
SHG1	II	complement(729734,,730162)	-0.45	-1.36	0.67
DUT1	II	722611,,723054	-0.46	-1.38	0.54
YBL109W	II	5790,,6125	-0.61	-1.52	0.75
MRPL37	II	741299,,741616	-0.69	-1.62	0.37
YBL028C	II	complement(167518,,167838)	-0.77	-1.7	0.29
YBL096C	II	complement(43174,,43482)	-0.9	-1.86	0.34
TRS20	II	complement(723736,,724263)	-0.9	-1.86	0.34
YBL111C	II	complement(2907,,5009)	-0.93	-1.91	0.34
PCH2	II	600553,,602360	-12.2606	-2	0.5
YCL020W	III	85102..86418	6.98456	126.638	1.27463e-07
GFD2	III	59026,,60726	1.93	3.8	0.01
YCR099C	III	complement(300832,,301299)	1.17	2.25	0.49
YCL042W	III	50584,,50943	0.71	1.64	0.48
HBN1	III	complement(73405,,73986)	0.67	1.6	0.1
LEU2	III	91324,,92418	0.6	1.51	0.08
YCR043C	III	complement(206261,,206644)	0.53	1.44	0.57
FRM2	III	complement(74704,,75285)	0.43	1.34	0.25
RHB1	III	complement(167370,,167999)	0.42	1.34	0.4
YCL021W-A	III	83620,,83997	0.4	1.32	0.66
YCR025C	III	complement(163446,,163856)	0.4	1.32	0.66
YCR102C	III	complement(304361,,305467)	0.4	1.32	0.56
YCL049C	III	complement(39786,,40724)	0.37	1.29	0.3
HMRA2	III	complement(293179,,293538)	0.36	1.28	0.29
SPS22	III	42165,,43556	0.34	1.26	0.17
YCR007C	III	complement(126011,,126730)	0.34	1.27	0.5
YCL012C	III	complement(101317,,101788)	0.33	1.26	0.63
CHA1	III	complement(15798,,16880)	0.32	1.25	0.31
PGK1	III	137746,,138996	0.32	1.25	0.32
ERS1	III	complement(248033,,248815)	0.31	1.24	0.55
PET18	III	complement(154012,,154659)	0.28	1.21	0.38
YCR024C-B	III	complement(162599,,162865)	0.28	1.22	0.3
CIT2	III	complement(120946,,122328)	0.28	1.22	0.34
HIS4	III	complement(65934,,68333)	0.27	1.2	0.34
GEX1	III	complement(6479,,8326)	0.27	1.21	0.71
HSP30	III	complement(156109,,157107)	0.26	1.2	0.29
RRT12	III	complement(208135,,209610)	0.25	1.19	0.33
FYV5	III	complement(23523,,23981)	0.25	1.19	0.88
MAK31	III	complement(154830,,155096)	0.25	1.19	0.88
YCR045W-A	III	208751,,209101	0.25	1.19	0.88
YCR064C	III	complement(228095,,228505)	0.25	1.19	0.88
KAR4	III	27929,,28936	0.21	1.15	0.39
SYP1	III	complement(173826,,176438)	0.19	1.14	0.54
SRB8	III	254371,,258654	0.18	1.13	0.42
YCR023C	III	complement(158538,,160373)	0.16	1.12	0.56
CPR4	III	239055,,240011	0.15	1.11	0.39
CDC10	III	complement(117380,,118348)	0.15	1.11	0.5
KIN82	III	274404,,276566	0.15	1.11	0.61
TRX3	III	259578,,259961	0.15	1.11	0.7
MRPL32	III	118620,,119171	0.15	1.11	0.7
GLK1	III	50838,,52340	0.14	1.1	0.65
YCR061W	III	225563,,227458	0.14	1.1	0.5
AHC2	III	258883,,259269	0.14	1.1	0.53
YCR006C	III	complement(122530,,123003)	0.14	1.1	0.77
AAD3	III	313890,,314981	0.13	1.09	0.65
NFS1	III	complement(92777,,94270)	0.13	1.09	0.68
GIT1	III	complement(297049,,298605)	0.13	1.1	0.85
BPH1	III	179520,,186023	0.12	1.09	0.55
RPS14A	III	complement(177500,,178220)	0.12	1.09	0.55
CDC39	III	280117,,286443	0.12	1.09	0.64
GRX1	III	complement(60841,,61173)	0.12	1.09	0.72
STE50	III	63441,,64481	0.12	1.09	0.67
YCL019W	III	85102,,90415	0.11	1.08	0.69
RSA4	III	complement(240805,,242352)	0.1	1.07	0.71
YCR087C-A	III	complement(264006,,264467)	0.1	1.07	0.89
PDI1	III	complement(48653,,50221)	0.1	1.07	0.73
ILV6	III	complement(104619,,105548)	0.1	1.07	0.59
YCP4	III	complement(119575,,120318)	0.09	1.06	0.69
SGF29	III	complement(103571,,104350)	0.09	1.06	0.76
APA1	III	complement(37836,,38801)	0.08	1.05	0.67
EMC1	III	complement(44623,,46905)	0.08	1.05	0.7
RNQ1	III	70150,,71367	0.08	1.06	0.77
YCR016W	III	143634,,144506	0.08	1.06	0.77
DCC1	III	complement(94621,,95763)	0.07	1.05	0.79
MGR1	III	complement(47111,,48364)	0.06	1.04	0.73
SOL2	III	246963,,247910	0.06	1.04	0.78
NPP1	III	complement(164111,,166339)	0.06	1.04	0.85
PRD1	III	24768,,26906	0.05	1.03	0.83
FUB1	III	complement(249293,,250045)	0.05	1.04	0.82
ADP1	III	complement(133724,,136873)	0.05	1.04	0.86
IMG1	III	complement(209914,,210423)	0.05	1.04	0.89
PBN1	III	complement(34143,,35393)	0.04	1.02	0.84
THR4	III	216697,,218241	0.04	1.03	0.85
ADY2	III	complement(132273,,133124)	0.04	1.03	0.89
GID7	III	52645,,54882	0.03	1.02	0.87
RDS1	III	310958,,313456	0.03	1.02	0.89
RBK1	III	193297,,194298	0.03	1.02	0.9
SAT4	III	128470,,130281	0.03	1.02	0.88
VAC17	III	17290,,18561	0.03	1.02	0.92
TAF2	III	complement(201174,,205397)	0.03	1.02	0.87
PGS1	III	109105,,110670	0.02	1.01	0.95
PHO87	III	complement(194414,,197185)	0.02	1.01	0.92
FEN2	III	complement(170886,,172424)	0.02	1.01	0.93
ATG15	III	237214,,238776	0.02	1.01	0.93
HMLALPHA2	III	complement(12386,,13018)	0.02	1.01	0.96
CDC50	III	286762,,287937	0.02	1.02	0.91
CSM1	III	263392,,263964	0.01	1.01	0.96
SRD1	III	complement(148238,,148903)	0.01	1.01	0.99
CWH43	III	complement(144773,,147634)	0.00674	1	0.97
ATG22	III	complement(54941,,56527)	0.00545	1	0.98
BUD5	III	complement(197621,,199549)	0.00144	1	1
MIC10	III	complement(24032,,24325)	-0.00143	-1	1
SNT1	III	186489,,190169	-0.00757	-1.01	0.96
HCM1	III	229310,,231004	-0.01	-1.01	0.96
RVS161	III	complement(130745,,131542)	-0.01	-1.01	0.95
POF1	III	complement(43661,,44437)	-0.01	-1.01	0.97
TUP1	III	complement(260311,,262452)	-0.02	-1.01	0.92
SRO9	III	complement(57374,,58678)	-0.03	-1.02	0.91
ABP1	III	265068,,266846	-0.03	-1.02	0.86
BIK1	III	complement(68599,,69921)	-0.04	-1.03	0.92
LRE1	III	35865,,37616	-0.04	-1.03	0.87
SED4	III	complement(233125,,236322)	-0.04	-1.03	0.81
GBP2	III	complement(102075,,103358)	-0.05	-1.04	0.79
OCA4	III	complement(288170,,289258)	-0.05	-1.04	0.85
KCC4	III	79162,,82275	-0.05	-1.04	0.84
ARE1	III	211929,,213761	-0.05	-1.03	0.86
MRC1	III	complement(18816,,22106)	-0.05	-1.03	0.82
POL4	III	complement(139185,,140933)	-0.06	-1.05	0.81
RAD18	III	231500,,232963	-0.06	-1.04	0.9
MXR2	III	complement(62776,,63282)	-0.06	-1.04	0.86
YCL002C	III	complement(110808,,111675)	-0.06	-1.04	0.82
BUD3	III	96281,,101191	-0.07	-1.05	0.71
STP22	III	complement(105696,,106853)	-0.07	-1.05	0.85
LDB16	III	108021,,108791	-0.07	-1.05	0.84
LSB5	III	61658,,62722	-0.08	-1.06	0.65
YIH1	III	complement(223454,,224230)	-0.08	-1.06	0.78
BUD23	III	complement(210718,,211545)	-0.09	-1.07	0.68
FIG2	III	267434,,272263	-0.09	-1.06	0.76
PTC6	III	252845,,254173	-0.09	-1.06	0.69
CTR86	III	complement(218376,,220067)	-0.1	-1.07	0.79
SSK22	III	complement(242588,,246583)	-0.11	-1.08	0.69
RIM1	III	complement(172950,,173440)	-0.11	-1.08	0.71
AGP1	III	complement(76018,,77919)	-0.11	-1.08	0.58
PAT1	III	complement(250238,,252628)	-0.12	-1.09	0.69
KRR1	III	complement(22429,,23379)	-0.12	-1.09	0.58
PAU3	III	307801,,308175	-0.13	-1.09	0.92
RRP43	III	complement(191834,,193018)	-0.14	-1.1	0.57
SLM5	III	complement(160744,,162222)	-0.14	-1.1	0.68
MATALPHA2	III	complement(199546,,200178)	-0.14	-1.1	0.6
MAK32	III	152837,,153928	-0.15	-1.11	0.55
SPB1	III	31449,,33974	-0.16	-1.12	0.58
IMG2	III	complement(240103,,240543)	-0.16	-1.11	0.68
VMA9	III	107023,,107417	-0.17	-1.13	0.78
RRP7	III	complement(64675,,65568)	-0.17	-1.12	0.55
YCR015C	III	complement(141217,,142170)	-0.17	-1.12	0.64
HMRA1	III	293835,,294321	-0.19	-1.14	0.55
BUD31	III	228318,,228791	-0.22	-1.17	0.62
ELO2	III	190592,,191635	-0.22	-1.17	0.65
PWP2	III	complement(220457,,223228)	-0.22	-1.16	0.42
RSC6	III	214994,,216445	-0.23	-1.18	0.41
PER1	III	complement(206877,,207950)	-0.24	-1.18	0.63
YCR100C	III	complement(301271,,302221)	-0.25	-1.19	0.72
MSH3	III	complement(276764,,279820)	-0.26	-1.2	0.44
ADF1	III	23584,,23925	-0.27	-1.2	0.67
ADH7	III	309070,,310155	-0.27	-1.2	0.6
YCR090C	III	complement(272315,,272863)	-0.31	-1.24	0.47
PEX34	III	complement(26925,,27359)	-0.32	-1.25	0.49
YCR051W	III	214071,,214739	-0.33	-1.26	0.34
YCR041W	III	200911,,201243	-0.34	-1.26	0.65
YCR101C	III	complement(302482,,303030)	-0.36	-1.28	0.68
YCL048W-A	III	41488,,41727	-0.37	-1.29	0.45
RER1	III	111916,,112482	-0.39	-1.31	0.3
YCR075W-A	III	248975,,249202	-0.39	-1.31	0.74
HMLALPHA1	III	13282,,13809	-0.43	-1.35	0.58
FUS1	III	71803,,73341	-0.43	-1.34	0.34
TAH1	III	224399,,224734	-0.52	-1.44	0.59
YCL046W	III	46640,,46963	-0.61	-1.52	0.75
YCL041C	III	complement(50133,,50627)	-0.61	-1.52	0.75
YCL023C	III	complement(78949,,79296)	-0.61	-1.52	0.75
YCL022C	III	complement(81570,,82085)	-0.61	-1.52	0.75
HTL1	III	155320,,155556	-0.61	-1.52	0.75
YCR102W-A	III	306735,,306932	-0.61	-1.52	0.75
MATALPHA1	III	200442,,200969	-0.71	-1.63	0.52
YDR034C-C	IV	complement(518040..519356)	6.67447	102.145	3.88295e-05
YDR053W	IV	560249..560644	2.60161	6.06964	8.19084e-05
IPK1	IV	complement(1092741,,1093586)	1.53	2.89	0.36
YDR509W	IV	1468226,,1468573	1.53	2.89	0.36
COX9	IV	complement(334217,,334396)	1.2	2.3	0.3
YDL023C	IV	complement(411761,,412081)	1.04	2.06	0.44
RPS29B	IV	complement(340628,,340798)	0.73	1.66	0.27
YDR098C-B	IV	complement(645858,,651126)	0.71	1.64	0.48
YDR210W	IV	871074,,871301	0.71	1.64	0.48
YDL085C-A	IV	complement(302464,,302670)	0.7	1.63	0.39
YDL241W	IV	20635,,21006	0.67	1.59	0.55
DAD1	IV	complement(478474,,478758)	0.67	1.59	0.55
TRP1	IV	461842,,462516	0.59	1.5	0.09
YDR366C	IV	complement(1212438,,1212836)	0.48	1.39	0.68
GCV1	IV	complement(484163,,485365)	0.47	1.39	0.13
HBT1	IV	complement(57265,,60405)	0.46	1.38	0.2
SDH7	IV	1470017,,1470418	0.43	1.34	0.4
STF1	IV	229171,,229431	0.39	1.31	0.35
PCL9	IV	138291,,139205	0.35	1.27	0.51
CIA1	IV	complement(1002510,,1003502)	0.35	1.27	0.51
YDL157C	IV	complement(174232,,174588)	0.33	1.25	0.58
PLM2	IV	1451353,,1452918	0.32	1.24	0.26
TIM11	IV	complement(1112003,,1112293)	0.31	1.24	0.56
ATG31	IV	complement(488072,,488662)	0.31	1.24	0.37
RTN2	IV	94605,,95786	0.31	1.24	0.2
YPR1	IV	1213904,,1214842	0.31	1.24	0.2
PAD1	IV	1510902,,1511630	0.31	1.24	0.33
SPG3	IV	complement(1456311,,1456694)	0.29	1.22	0.41
PPH21	IV	complement(219662,,220771)	0.28	1.22	0.24
EMI1	IV	complement(1470500,,1471063)	0.27	1.2	0.75
YDR344C	IV	complement(1162006,,1162449)	0.27	1.2	0.79
SNA2	IV	1490596,,1490835	0.27	1.21	0.41
STE14	IV	complement(1292372,,1293091)	0.27	1.21	0.64
FIT1	IV	complement(1503314,,1504900)	0.26	1.2	0.28
MRH1	IV	508147,,509109	0.26	1.2	0.28
MHF2	IV	complement(169366,,169608)	0.26	1.2	0.85
FDC1	IV	1512094,,1513605	0.25	1.19	0.42
CTA1	IV	complement(968133,,969680)	0.25	1.19	0.3
TSA2	IV	complement(1365072,,1365662)	0.25	1.19	0.54
YDL187C	IV	complement(125509,,125838)	0.25	1.19	0.88
YDL158C	IV	complement(173866,,174174)	0.25	1.19	0.88
YDR170W-A	IV	803195,,804517	0.25	1.19	0.88
YDR182W-A	IV	829151,,829354	0.25	1.19	0.88
YDR199W	IV	854175,,854540	0.25	1.19	0.88
VAM6	IV	complement(316971,,320120)	0.25	1.19	0.3
YFT2	IV	complement(1105003,,1105827)	0.24	1.18	0.49
RPL27B	IV	1401770,,1402564	0.24	1.18	0.46
TPI1	IV	complement(555726,,556472)	0.24	1.18	0.36
SCM3	IV	complement(211375,,212046)	0.24	1.18	0.61
GLT1	IV	complement(149203,,155640)	0.24	1.18	0.4
SPS2	IV	complement(1483795,,1485303)	0.24	1.18	0.33
TMA17	IV	complement(264512,,264964)	0.24	1.18	0.33
SED1	IV	600793,,601809	0.23	1.17	0.46
MCH1	IV	complement(359825,,361285)	0.23	1.17	0.34
CDC53	IV	224304,,226751	0.23	1.17	0.32
YDR133C	IV	complement(720962,,721297)	0.23	1.17	0.47
YDR018C	IV	complement(482670,,483860)	0.23	1.18	0.19
CAB1	IV	1498232,,1499335	0.23	1.18	0.31
ECM11	IV	1353725,,1354633	0.22	1.16	0.33
GPD1	IV	411825,,413000	0.22	1.16	0.47
FMP45	IV	complement(60872,,61801)	0.22	1.16	0.36
RPL35A	IV	117664,,118517	0.22	1.16	0.39
VHS1	IV	956013,,957398	0.22	1.16	0.36
EMI2	IV	complement(1474974,,1476476)	0.22	1.16	0.33
PDR15	IV	1279210,,1283799	0.22	1.17	0.35
YDL124W	IV	240259,,241197	0.22	1.17	0.37
DON1	IV	1010176,,1011273	0.21	1.16	0.38
RPN5	IV	190924,,192261	0.21	1.16	0.48
ENA5	IV	complement(527422,,530697)	0.2	1.15	0.51
ESC2	IV	1199183,,1200553	0.2	1.15	0.41
ADY3	IV	complement(26403,,28775)	0.2	1.15	0.31
PST2	IV	complement(504099,,504695)	0.19	1.14	0.44
SPR28	IV	complement(903781,,905052)	0.19	1.14	0.39
GRX2	IV	1471017,,1471448	0.19	1.14	0.28
AAD4	IV	complement(17577,,18566)	0.19	1.14	0.61
DIA3	IV	complement(408451,,409857)	0.19	1.14	0.29
MKC7	IV	complement(744311,,746101)	0.19	1.14	0.8
PRR2	IV	complement(74446,,76545)	0.19	1.14	0.55
YDL027C	IV	complement(403695,,404957)	0.18	1.13	0.55
RAD59	IV	complement(344237,,344953)	0.18	1.13	0.51
TVP23	IV	complement(613405,,614004)	0.18	1.13	0.74
YDR124W	IV	700315,,701289	0.18	1.13	0.82
BMH2	IV	653607,,654428	0.18	1.13	0.5
NPC2	IV	371240,,371761	0.18	1.14	0.3
DUN1	IV	complement(280307,,281848)	0.18	1.14	0.52
UBC5	IV	complement(569234,,569770)	0.17	1.12	0.48
KGD2	IV	complement(753675,,755066)	0.17	1.12	0.54
GNP1	IV	complement(1466453,,1468444)	0.17	1.12	0.57
RPT3	IV	1261681,,1262967	0.17	1.13	0.45
SDH6	IV	complement(1233278,,1233517)	0.17	1.13	0.76
RPN9	IV	1322205,,1323386	0.17	1.13	0.41
QCR7	IV	complement(1496165,,1496548)	0.16	1.12	0.37
ENA1	IV	complement(535192,,538467)	0.16	1.12	0.59
BCS1	IV	complement(1225166,,1226536)	0.16	1.12	0.64
DET1	IV	complement(557056,,558060)	0.15	1.11	0.6
HNT1	IV	complement(239019,,239606)	0.15	1.11	0.46
CDC7	IV	424209,,425732	0.15	1.11	0.46
DIN7	IV	complement(994242,,995534)	0.15	1.11	0.75
YDR476C	IV	complement(1410453,,1411127)	0.15	1.11	0.57
HNT2	IV	complement(1072746,,1073488)	0.15	1.11	0.68
SLD5	IV	1431012,,1431896	0.15	1.11	0.68
HEH2	IV	complement(1380055,,1382046)	0.15	1.11	0.6
UBA2	IV	complement(1254937,,1256847)	0.15	1.11	0.52
GRX6	IV	432330,,433025	0.15	1.11	0.5
NTH1	IV	complement(450220,,452475)	0.15	1.11	0.61
PET100	IV	603064,,603399	0.14	1.1	0.71
RPS18A	IV	1359923,,1360798	0.14	1.1	0.62
RPL37B	IV	complement(1450198,,1450853)	0.14	1.1	0.65
MAF1	IV	complement(456836,,458103)	0.14	1.1	0.6
YDL199C	IV	complement(101290,,103353)	0.14	1.1	0.51
GPM2	IV	413953,,414888	0.14	1.11	0.6
CPR5	IV	complement(1071880,,1072557)	0.13	1.09	0.51
RKM4	IV	complement(969990,,971474)	0.13	1.09	0.66
GMC1	IV	complement(1459728,,1461554)	0.13	1.09	0.51
PHO92	IV	complement(1223474,,1224394)	0.13	1.09	0.53
SDH4	IV	817950,,818495	0.13	1.09	0.43
PCL2	IV	234927,,235853	0.13	1.09	0.77
SOK1	IV	complement(458542,,461247)	0.13	1.09	0.51
AMD2	IV	946807,,948456	0.13	1.09	0.58
VCX1	IV	232652,,233887	0.13	1.09	0.62
ADK1	IV	916486,,917154	0.13	1.1	0.45
CDC37	IV	790328,,791848	0.13	1.1	0.49
MIX14	IV	503498,,503863	0.13	1.1	0.85
HPT1	IV	1270068,,1270733	0.13	1.1	0.65
YDL129W	IV	231024,,231899	0.13	1.1	0.76
UFD2	IV	complement(118707,,121592)	0.13	1.1	0.52
NUS1	IV	114672,,115799	0.12	1.08	0.6
PMT7	IV	1075865,,1077853	0.12	1.08	0.58
PPH22	IV	complement(123865,,124998)	0.12	1.08	0.51
RPL31A	IV	322226,,322988	0.12	1.09	0.63
RDI1	IV	complement(218680,,219288)	0.12	1.09	0.65
YDR154C	IV	complement(768403,,768753)	0.12	1.09	0.55
ENT1	IV	167714,,169078	0.12	1.09	0.54
CDC48	IV	complement(236157,,238664)	0.12	1.09	0.69
GCN2	IV	complement(1025070,,1030049)	0.12	1.09	0.53
VPS60	IV	complement(1427431,,1428120)	0.12	1.09	0.59
RPT2	IV	438047,,439360	0.12	1.09	0.59
CHL4	IV	965113,,966489	0.12	1.09	0.68
TOM1	IV	1369790,,1379596	0.11	1.08	0.68
RRG1	IV	580687,,581784	0.11	1.08	0.69
NGG1	IV	814452,,816560	0.11	1.08	0.59
MSS4	IV	868224,,870563	0.11	1.08	0.54
YET3	IV	complement(329836,,330447)	0.11	1.08	0.59
BUG1	IV	283419,,284444	0.11	1.08	0.54
GYP7	IV	complement(34237,,36477)	0.11	1.08	0.59
NUP84	IV	251566,,253746	0.11	1.08	0.53
TIM22	IV	complement(67983,,68606)	0.11	1.08	0.71
TRR1	IV	1183299,,1184258	0.11	1.08	0.55
YDR262W	IV	993134,,993952	0.11	1.08	0.55
SNU56	IV	complement(943674,,945152)	0.11	1.08	0.78
CRF1	IV	912099,,913502	0.11	1.08	0.61
SCC2	IV	821295,,825776	0.1	1.07	0.69
ARG82	IV	complement(810565,,811632)	0.1	1.07	0.61
SES1	IV	489508,,490896	0.1	1.07	0.61
PSP1	IV	complement(1456695,,1459220)	0.1	1.07	0.64
NSE3	IV	1037195,,1038106	0.1	1.07	0.71
SIP1	IV	complement(1315326,,1317773)	0.1	1.07	0.75
MSS2	IV	268921,,269976	0.1	1.07	0.83
LYS20	IV	133437,,134723	0.1	1.07	0.65
WHI4	IV	complement(54397,,56346)	0.1	1.07	0.66
SRB7	IV	complement(1078027,,1078449)	0.1	1.07	0.88
GTB1	IV	907330,,909438	0.1	1.07	0.6
GRH1	IV	1477239,,1478357	0.09	1.06	0.62
TSC13	IV	complement(426002,,426934)	0.09	1.06	0.69
RPS17B	IV	complement(1354829,,1355553)	0.09	1.06	0.74
AHA1	IV	892875,,893927	0.09	1.06	0.62
YDR543C	IV	complement(1524634,,1524933)	0.09	1.06	0.82
THI74	IV	1338274,,1339386	0.09	1.06	0.74
STP1	IV	1386816,,1388375	0.09	1.06	0.66
RNH202	IV	1019368,,1020420	0.09	1.06	0.68
PEX5	IV	950563,,952401	0.09	1.06	0.64
SEM1	IV	1202128,,1202397	0.09	1.06	0.8
RAV2	IV	complement(856898,,857953)	0.09	1.06	0.65
MET32	IV	complement(963990,,964565)	0.09	1.07	0.71
DLD2	IV	139522,,141114	0.09	1.07	0.74
NRG1	IV	complement(542674,,543369)	0.09	1.07	0.66
COQ4	IV	858137,,859144	0.09	1.07	0.66
ZIP1	IV	1032436,,1035063	0.09	1.07	0.73
RPP1B	IV	229906,,230527	0.08	1.05	0.81
ARO10	IV	1234218,,1236125	0.08	1.05	0.67
YDR306C	IV	complement(1073735,,1075171)	0.08	1.05	0.67
YDL109C	IV	complement(265258,,267201)	0.08	1.05	0.78
HEM12	IV	551860,,552948	0.08	1.05	0.79
SAM2	IV	complement(1453310,,1454464)	0.08	1.05	0.64
COX26	IV	691014,,691214	0.08	1.06	0.82
COS7	IV	1802,,2953	0.08	1.06	0.77
REG1	IV	complement(497835,,500879)	0.08	1.06	0.7
LUC7	IV	complement(300214,,300999)	0.08	1.06	0.75
LHP1	IV	363952,,364779	0.08	1.06	0.72
RAD57	IV	455201,,456583	0.08	1.06	0.73
YDR524C-B	IV	complement(1489598,,1489798)	0.08	1.06	0.83
LSM6	IV	complement(1229349,,1229609)	0.08	1.06	0.91
DIT2	IV	complement(1272234,,1273703)	0.08	1.06	0.91
YDR157W	IV	769931,,770332	0.08	1.06	0.94
PFA5	IV	complement(1382319,,1383443)	0.08	1.06	0.78
SFA1	IV	159604,,160764	0.08	1.06	0.68
URC2	IV	complement(1481085,,1483403)	0.08	1.06	0.67
PIB1	IV	complement(1089219,,1090079)	0.08	1.06	0.79
PRP42	IV	933504,,935138	0.08	1.06	0.76
SEC20	IV	complement(1445843,,1446994)	0.07	1.05	0.71
ADR1	IV	895035,,899006	0.07	1.05	0.79
ATG20	IV	complement(256633,,258555)	0.07	1.05	0.66
MSH5	IV	178334,,181039	0.07	1.05	0.68
SNQ2	IV	465919,,470424	0.07	1.05	0.78
MDH3	IV	complement(315357,,316388)	0.07	1.05	0.68
UBC9	IV	337487,,338070	0.07	1.05	0.8
MSS116	IV	complement(845952,,847946)	0.07	1.05	0.74
PPM1	IV	complement(1332983,,1333969)	0.07	1.05	0.85
SNM1	IV	1414575,,1415171	0.07	1.05	0.84
NAT1	IV	complement(378874,,381438)	0.06	1.04	0.76
STB3	IV	complement(792348,,793889)	0.06	1.04	0.72
SEC26	IV	complement(937895,,940816)	0.06	1.04	0.76
RTN1	IV	complement(929470,,930357)	0.06	1.04	0.71
YDL177C	IV	complement(141209,,141721)	0.06	1.04	0.9
ERP3	IV	complement(422833,,423510)	0.06	1.04	0.9
GET3	IV	complement(282112,,283176)	0.06	1.04	0.73
TFB3	IV	1383811,,1384776	0.06	1.04	0.77
PEX29	IV	complement(1415210,,1416874)	0.06	1.04	0.83
RLI1	IV	complement(626708,,628534)	0.06	1.04	0.75
IRC3	IV	1131001,,1133070	0.06	1.04	0.82
TIF35	IV	complement(1324477,,1325301)	0.06	1.04	0.78
SPC110	IV	1186107,,1188941	0.06	1.04	0.79
GCD6	IV	884727,,886865	0.06	1.04	0.75
CDC9	IV	complement(164987,,167254)	0.06	1.05	0.8
VPS3	IV	complement(1438115,,1441150)	0.06	1.05	0.73
YDR239C	IV	complement(941057,,943420)	0.06	1.05	0.73
FAL1	IV	486804,,488003	0.06	1.05	0.81
RGP1	IV	728259,,730250	0.06	1.05	0.81
STL1	IV	1508005,,1509714	0.06	1.05	0.81
ASM4	IV	complement(298417,,300003)	0.06	1.05	0.77
KRE2	IV	1421157,,1422485	0.05	1.03	0.8
RRP1	IV	complement(617470,,618306)	0.05	1.03	0.87
LYS21	IV	227393,,228715	0.05	1.03	0.78
KCS1	IV	complement(479115,,482267)	0.05	1.03	0.87
SWM1	IV	complement(976717,,977229)	0.05	1.03	0.85
MRPS28	IV	1146319,,1147179	0.05	1.03	0.89
YCF1	IV	complement(723004,,727551)	0.05	1.03	0.79
CYM1	IV	complement(1325501,,1328470)	0.05	1.03	0.79
CFT1	IV	1063352,,1067425	0.05	1.03	0.8
LCB2	IV	576474,,578159	0.05	1.03	0.78
RPL13A	IV	308424,,309388	0.05	1.03	0.87
FAD1	IV	complement(372688,,373608)	0.05	1.04	0.84
UBX3	IV	complement(293392,,294759)	0.05	1.04	0.76
YDR444W	IV	1350290,,1352353	0.05	1.04	0.78
PRO1	IV	complement(1061505,,1062791)	0.05	1.04	0.79
THI3	IV	complement(310642,,312471)	0.05	1.04	0.77
SNX41	IV	1320064,,1321941	0.05	1.04	0.79
YDL206W	IV	90176,,92464	0.05	1.04	0.8
YDL073W	IV	326613,,329567	0.05	1.04	0.78
EUG1	IV	1478608,,1480161	0.05	1.04	0.83
SSD1	IV	complement(1045640,,1049392)	0.05	1.04	0.82
MED2	IV	complement(441014,,442309)	0.05	1.04	0.77
ARP10	IV	667004,,667858	0.05	1.04	0.95
MPS1	IV	complement(400997,,403291)	0.05	1.04	0.79
KRE28	IV	complement(1499396,,1500553)	0.04	1.02	0.87
AFR1	IV	complement(614288,,616150)	0.04	1.02	0.84
AKR1	IV	complement(996029,,998323)	0.04	1.02	0.91
FMP16	IV	complement(588098,,588379)	0.04	1.02	0.84
GDH2	IV	complement(70640,,73918)	0.04	1.03	0.84
YDR061W	IV	574164,,575783	0.04	1.03	0.83
PEX3	IV	complement(1126270,,1127595)	0.04	1.03	0.82
CAD1	IV	complement(1318046,,1319275)	0.04	1.03	0.89
HSP31	IV	complement(1501447,,1502160)	0.04	1.03	0.83
VMA1	IV	126787,,130002	0.04	1.03	0.84
RPC53	IV	183343,,184611	0.04	1.03	0.82
PDS1	IV	complement(680496,,681617)	0.04	1.03	0.83
SEC5	IV	complement(786306,,789221)	0.04	1.03	0.81
GIS1	IV	637139,,639823	0.04	1.03	0.83
DBF4	IV	complement(558511,,560625)	0.04	1.03	0.8
YDL114W	IV	255604,,256530	0.04	1.03	0.89
MFB1	IV	complement(905455,,906852)	0.04	1.03	0.85
CRD1	IV	complement(201719,,202570)	0.04	1.03	0.91
PBP4	IV	complement(361699,,362256)	0.04	1.03	0.86
HTA1	IV	915530,,915928	0.04	1.03	0.83
VPS64	IV	complement(854279,,856093)	0.04	1.03	0.83
SIZ1	IV	1289406,,1292120	0.04	1.03	0.85
DPL1	IV	complement(1050459,,1052228)	0.04	1.03	0.84
YDR094W	IV	635840,,636175	0.03	1.02	0.94
RTK1	IV	complement(405344,,407206)	0.03	1.02	0.91
CWC2	IV	complement(86207,,87226)	0.03	1.02	0.89
VPS74	IV	complement(1221112,,1222149)	0.03	1.02	0.85
IPT1	IV	complement(589761,,591344)	0.03	1.02	0.84
RPN4	IV	complement(415113,,416708)	0.03	1.02	0.89
GUK1	IV	complement(1366264,,1366827)	0.03	1.02	0.9
BDF2	IV	331024,,332940	0.03	1.02	0.9
RQC1	IV	complement(1133260,,1135431)	0.03	1.02	0.86
PSF1	IV	473157,,473783	0.03	1.02	0.93
YDL218W	IV	66493,,67446	0.03	1.02	0.96
PKH1	IV	complement(1431968,,1434268)	0.03	1.02	0.86
STE7	IV	172481,,174028	0.03	1.02	0.9
MNN10	IV	952800,,953981	0.03	1.02	0.86
YPD1	IV	complement(33415,,33918)	0.03	1.02	0.94
MSN5	IV	1141168,,1144842	0.03	1.02	0.86
RPL12B	IV	1301616,,1302113	0.03	1.02	0.89
BAP3	IV	complement(548762,,550576)	0.03	1.02	0.91
UBC1	IV	816878,,817525	0.03	1.02	0.9
EHD3	IV	complement(523211,,524713)	0.03	1.02	0.92
CYK3	IV	248581,,251238	0.03	1.02	0.89
LYS14	IV	complement(509737,,512109)	0.03	1.02	0.9
YDL183C	IV	complement(130871,,131833)	0.02	1.01	0.95
SUP35	IV	808324,,810381	0.02	1.01	0.9
MSC2	IV	859346,,861520	0.02	1.01	0.92
EKI1	IV	751631,,753235	0.02	1.01	0.92
PHO2	IV	complement(270222,,271901)	0.02	1.01	0.92
RPB7	IV	complement(1276654,,1277169)	0.02	1.01	0.95
MTH1	IV	complement(1014401,,1015702)	0.02	1.01	0.92
CCC2	IV	1005675,,1008689	0.02	1.01	0.92
PAR32	IV	148191,,149078	0.02	1.01	0.92
APC4	IV	685882,,687840	0.02	1.01	0.92
YRB1	IV	453045,,453650	0.02	1.01	0.93
IDP1	IV	334835,,336121	0.02	1.01	0.92
APA2	IV	complement(1496791,,1497768)	0.02	1.01	0.92
RPO21	IV	complement(205360,,210561)	0.02	1.01	0.93
TRS23	IV	954288,,954947	0.02	1.01	0.95
QRI1	IV	complement(275148,,276581)	0.02	1.01	0.92
EBS1	IV	862054,,864708	0.02	1.01	0.92
PPH3	IV	597156,,598082	0.02	1.01	0.95
ATP22	IV	complement(1176120,,1178174)	0.02	1.01	0.93
STP4	IV	complement(366739,,368211)	0.02	1.01	0.92
SBE2	IV	1178666,,1181260	0.02	1.01	0.92
RPN6	IV	complement(285391,,286695)	0.02	1.01	0.94
UPS3	IV	complement(831934,,832473)	0.02	1.01	0.96
SNA4	IV	241418,,241840	0.02	1.01	0.96
MSH6	IV	complement(640109,,643837)	0.02	1.02	0.91
MTC5	IV	709549,,712995	0.02	1.02	0.89
CLB3	IV	176773,,178056	0.02	1.02	0.91
EAF1	IV	complement(1191936,,1194884)	0.02	1.02	0.88
RMD5	IV	complement(966557,,967822)	0.02	1.02	0.93
HEL2	IV	complement(1000104,,1002023)	0.02	1.02	0.91
DOP1	IV	complement(734901,,739997)	0.02	1.02	0.89
COP1	IV	complement(194571,,198176)	0.02	1.02	0.91
BRE4	IV	complement(38867,,42244)	0.02	1.02	0.89
YDL176W	IV	142097,,144223	0.01	1.01	0.93
ADA2	IV	1356065,,1357369	0.01	1.01	0.96
HSP78	IV	complement(971808,,974243)	0.01	1.01	0.96
DPB4	IV	693585,,694175	0.01	1.01	0.95
SEC31	IV	107208,,111029	0.01	1.01	0.95
UBX5	IV	1127872,,1129374	0.01	1.01	0.94
UBC13	IV	629876,,630605	0.01	1.01	0.96
RTR2	IV	complement(581908,,582498)	0.01	1.01	0.99
YDR210C-C	IV	complement(882605,,883927)	0.01	1.01	0.99
PMP3	IV	complement(1013476,,1013643)	0.01	1.01	0.99
ENT5	IV	complement(766736,,767971)	0.01	1.01	0.95
GPI19	IV	1337352,,1337774	0.01	1.01	0.99
SEC7	IV	complement(796193,,802222)	0.01	1.01	0.96
ECM18	IV	complement(701397,,702758)	0.00984	1.01	0.98
CBS2	IV	851228,,852397	0.00981	1.01	0.98
FOB1	IV	676102,,677802	0.0098	1.01	0.97
PPN1	IV	1362878,,1364902	0.00965	1.01	0.96
SHS1	IV	52445,,54100	0.0095	1.01	0.96
PAA1	IV	complement(588827,,589402)	0.00802	1.01	0.96
YOS9	IV	565927,,567555	0.00786	1.01	0.97
HDA2	IV	complement(1052623,,1054647)	0.00714	1	0.97
SLY1	IV	838392,,840392	0.00702	1	0.97
DOA4	IV	complement(584939,,587719)	0.00653	1	0.97
DHH1	IV	complement(170410,,171930)	0.00597	1	0.98
TCP1	IV	887232,,888911	0.00555	1	0.97
NUM1	IV	755628,,763874	0.00529	1	0.98
YDR222W	IV	910054,,911301	0.00497	1	0.98
APC11	IV	433497,,433994	0.00459	1	0.99
HEM1	IV	927452,,929098	0.00389	1	0.99
VPS72	IV	complement(1424820,,1427207)	0.00355	1	0.98
ARO3	IV	521816,,522928	0.00353	1	0.98
PEX19	IV	complement(336249,,337277)	0.00287	1	0.99
YDR341C	IV	complement(1151803,,1153626)	0.00277	1	0.99
CDC40	IV	complement(1202843,,1204210)	0.00228	1	0.99
ARO1	IV	704484,,709250	0.00207	1	0.99
MRP20	IV	1277646,,1278437	0.00165	1	1
DIT1	IV	1274602,,1276212	0.00153	1	1
LYS4	IV	931129,,933210	0.00111	1	0.99
FIN1	IV	complement(715747,,716622)	-0.000547	-1	1
ARF1	IV	116321,,116866	-0.00216	-1	0.99
PHO8	IV	complement(1418550,,1420250)	-0.00321	-1	0.98
RSM10	IV	539803,,540414	-0.00341	-1	0.99
ASP1	IV	1108702,,1109847	-0.00415	-1	0.99
AIM6	IV	30657,,31829	-0.00436	-1	0.99
RVS167	IV	1250186,,1251634	-0.00452	-1	0.98
RAD55	IV	598468,,599688	-0.00475	-1	0.99
PEX7	IV	complement(740473,,741600)	-0.00551	-1	0.98
HSP42	IV	806621,,807748	-0.00557	-1	0.98
IRC4	IV	complement(1517136,,1517675)	-0.00703	-1	0.99
PAM1	IV	960614,,963106	-0.00734	-1.01	0.97
NHX1	IV	1367485,,1369386	-0.00836	-1.01	0.96
TPS2	IV	593893,,596583	-0.00846	-1.01	0.97
PCF11	IV	complement(921926,,923806)	-0.00955	-1.01	0.97
BSC1	IV	complement(384601,,385587)	-0.00967	-1.01	0.96
DOT1	IV	1342493,,1344241	-0.00967	-1.01	0.98
UTP6	IV	complement(1357580,,1358902)	-0.01	-1.01	0.97
YDR391C	IV	complement(1257358,,1258056)	-0.01	-1.01	0.97
SLF1	IV	1473429,,1474772	-0.01	-1.01	0.97
SDC1	IV	1399015,,1399542	-0.01	-1.01	0.97
GIN4	IV	complement(1462358,,1465786)	-0.01	-1.01	0.96
DNF2	IV	631282,,636120	-0.01	-1.01	0.95
AGE1	IV	complement(1487542,,1488990)	-0.01	-1.01	0.96
PMT5	IV	289909,,292140	-0.01	-1.01	0.95
POL3	IV	276872,,280165	-0.01	-1.01	0.94
ARF2	IV	216529,,217074	-0.01	-1.01	0.94
EXG2	IV	complement(977521,,979209)	-0.01	-1.01	0.98
RBA50	IV	1491094,,1492413	-0.01	-1.01	0.96
HKR1	IV	1306267,,1311675	-0.01	-1.01	0.95
GPR1	IV	complement(389172,,392057)	-0.01	-1.01	0.93
ATG9	IV	184925,,187918	-0.01	-1.01	0.94
AIM7	IV	578663,,579112	-0.01	-1.01	0.97
SAN1	IV	complement(742042,,743874)	-0.01	-1.01	0.94
PTP1	IV	42700,,43707	-0.02	-1.02	0.91
SYF1	IV	1298432,,1301011	-0.02	-1.02	0.9
ADE8	IV	complement(1288215,,1288859)	-0.02	-1.02	0.93
SPP41	IV	1388872,,1393179	-0.02	-1.02	0.89
YDR089W	IV	622112,,624721	-0.02	-1.02	0.91
SIT4	IV	369771,,370706	-0.02	-1.02	0.89
ATP17	IV	1228611,,1228916	-0.02	-1.02	0.93
TAF12	IV	746738,,748357	-0.02	-1.02	0.9
SKP1	IV	complement(1125434,,1126018)	-0.02	-1.02	0.9
UBP1	IV	242552,,244981	-0.02	-1.02	0.91
RGA2	IV	1230167,,1233196	-0.02	-1.02	0.89
YRA1	IV	1236558,,1238004	-0.02	-1.02	0.89
YDR132C	IV	complement(718816,,720303)	-0.02	-1.01	0.95
PDC2	IV	complement(607304,,610081)	-0.02	-1.01	0.93
BCP1	IV	complement(1195412,,1196263)	-0.02	-1.01	0.94
VPS41	IV	604008,,606986	-0.02	-1.01	0.93
HED1	IV	477797,,478285	-0.02	-1.01	0.92
YDL086W	IV	301413,,302234	-0.02	-1.01	0.93
PKH3	IV	1395121,,1397817	-0.02	-1.01	0.93
YDR179W-A	IV	819433,,820824	-0.02	-1.01	0.95
OSH2	IV	complement(417663,,421514)	-0.02	-1.01	0.95
SUM1	IV	complement(1081128,,1084316)	-0.02	-1.01	0.92
PPZ2	IV	1334821,,1336953	-0.02	-1.01	0.92
ATP16	IV	443029,,443511	-0.02	-1.01	0.92
SAC3	IV	771877,,775782	-0.02	-1.01	0.93
FRQ1	IV	1222759,,1223331	-0.02	-1.01	0.92
NUR1	IV	296820,,298274	-0.02	-1.01	0.94
MCD1	IV	444683,,446383	-0.02	-1.01	0.95
SNF3	IV	111580,,114234	-0.02	-1.01	0.91
TRS120	IV	complement(1284069,,1287938)	-0.02	-1.01	0.91
SUR2	IV	1056551,,1057600	-0.02	-1.01	0.91
SMT3	IV	1469400,,1469705	-0.03	-1.02	0.9
ARH1	IV	1226822,,1228303	-0.03	-1.02	0.94
VMS1	IV	553254,,555152	-0.03	-1.02	0.89
RPL35B	IV	217600,,218367	-0.03	-1.02	0.89
TRM3	IV	258915,,263225	-0.03	-1.02	0.88
RRP42	IV	complement(263313,,264110)	-0.03	-1.02	0.91
UGA3	IV	156318,,157904	-0.03	-1.02	0.91
COX20	IV	complement(926293,,926910)	-0.03	-1.02	0.91
ATO3	IV	complement(1241204,,1242031)	-0.03	-1.02	0.87
SLM3	IV	complement(392659,,393912)	-0.03	-1.02	0.88
DFM1	IV	complement(1293369,,1294394)	-0.03	-1.02	0.91
HMO1	IV	812110,,812850	-0.03	-1.02	0.91
YDR248C	IV	complement(957758,,958339)	-0.03	-1.02	0.91
YPS7	IV	complement(1172386,,1174176)	-0.03	-1.02	0.92
MAK21	IV	570649,,573726	-0.03	-1.02	0.88
ATP5	IV	complement(1058176,,1058814)	-0.03	-1.02	0.86
NPL3	IV	1328783,,1330027	-0.03	-1.02	0.85
SAC6	IV	complement(713340,,715379)	-0.03	-1.02	0.92
EFT2	IV	1243230,,1245758	-0.03	-1.02	0.84
NOP14	IV	complement(188154,,190586)	-0.03	-1.02	0.86
CSN9	IV	complement(818708,,819196)	-0.03	-1.02	0.92
SEC1	IV	complement(782041,,784215)	-0.03	-1.02	0.86
CBS1	IV	complement(333121,,333810)	-0.04	-1.03	0.92
DOS2	IV	583713,,584645	-0.04	-1.03	0.88
BRE1	IV	complement(324047,,326149)	-0.04	-1.03	0.85
GCS1	IV	complement(51115,,52173)	-0.04	-1.03	0.86
TSR1	IV	341619,,343985	-0.04	-1.03	0.85
YDR042C	IV	complement(540601,,541203)	-0.04	-1.03	0.9
YDR056C	IV	complement(565023,,565640)	-0.04	-1.03	0.85
SWR1	IV	1135932,,1140476	-0.04	-1.03	0.81
RPP1A	IV	complement(309802,,310122)	-0.04	-1.03	0.87
SWA2	IV	complement(1106095,,1108101)	-0.04	-1.03	0.85
VPS54	IV	complement(494649,,497318)	-0.04	-1.03	0.82
HLR1	IV	1494586,,1495857	-0.04	-1.03	0.91
SYO1	IV	complement(338272,,340134)	-0.04	-1.03	0.84
DLD1	IV	complement(145826,,147589)	-0.04	-1.03	0.82
MRK1	IV	complement(312951,,314748)	-0.04	-1.03	0.87
URH1	IV	1271063,,1272085	-0.04	-1.03	0.83
SXM1	IV	1263324,,1266158	-0.04	-1.03	0.84
SRF1	IV	222427,,223740	-0.04	-1.03	0.82
NDE2	IV	303211,,304848	-0.04	-1.03	0.81
PEP7	IV	complement(1112480,,1114027)	-0.04	-1.03	0.85
NOP6	IV	complement(77289,,77966)	-0.04	-1.03	0.87
GGC1	IV	complement(103649,,104551)	-0.04	-1.02	0.92
UPC2	IV	889751,,892492	-0.05	-1.04	0.76
TLG1	IV	complement(1398026,,1398700)	-0.05	-1.04	0.86
RSM24	IV	complement(813193,,814152)	-0.05	-1.04	0.85
YSP2	IV	complement(1120609,,1124925)	-0.05	-1.04	0.87
PEX10	IV	998864,,999877	-0.05	-1.04	0.83
PAC11	IV	complement(1429188,,1430789)	-0.05	-1.04	0.8
HRQ1	IV	1039728,,1042961	-0.05	-1.04	0.77
TRS31	IV	1403322,,1404173	-0.05	-1.04	0.89
CDC34	IV	complement(561440,,562327)	-0.05	-1.04	0.79
SIR4	IV	917571,,921647	-0.05	-1.04	0.79
SIR2	IV	complement(376757,,378445)	-0.05	-1.04	0.88
RTT103	IV	complement(1038280,,1039509)	-0.05	-1.04	0.77
TRM82	IV	784871,,786205	-0.05	-1.04	0.85
USO1	IV	345665,,351037	-0.05	-1.04	0.8
TRS85	IV	671269,,673365	-0.05	-1.03	0.82
SPC19	IV	856317,,856814	-0.05	-1.03	0.9
RAD28	IV	complement(501753,,503273)	-0.05	-1.03	0.84
RRI1	IV	complement(68997,,70319)	-0.05	-1.03	0.86
MHR1	IV	1055212,,1055892	-0.05	-1.03	0.85
YDR461C-A	IV	complement(1385524,,1385766)	-0.05	-1.03	0.93
RSC3	IV	complement(1068729,,1071386)	-0.05	-1.03	0.84
NRP1	IV	complement(160995,,163154)	-0.05	-1.03	0.89
SUB2	IV	305237,,306577	-0.05	-1.03	0.87
UTP5	IV	1267471,,1269402	-0.06	-1.05	0.76
YDR210C-D	IV	complement(878659,,883927)	-0.06	-1.05	0.81
SHE9	IV	1259901,,1261271	-0.06	-1.04	0.84
DXO1	IV	complement(1217782,,1219110)	-0.06	-1.04	0.9
YDR186C	IV	complement(832859,,835492)	-0.06	-1.04	0.79
LPP1	IV	complement(1455042,,1455866)	-0.06	-1.04	0.86
SPO71	IV	complement(661173,,664910)	-0.06	-1.04	0.79
MZM1	IV	1436217,,1436588	-0.06	-1.04	0.9
TFB1	IV	1085065,,1086993	-0.06	-1.04	0.75
TMS1	IV	complement(665349,,666770)	-0.06	-1.04	0.83
RXT3	IV	complement(320668,,321552)	-0.06	-1.04	0.86
RGT2	IV	213351,,215642	-0.06	-1.04	0.78
YDL180W	IV	135896,,137539	-0.06	-1.04	0.76
SSF2	IV	1087581,,1088942	-0.06	-1.04	0.75
CTH1	IV	complement(764178,,765155)	-0.06	-1.04	0.75
KIN28	IV	267698,,268699	-0.06	-1.04	0.84
UME6	IV	complement(865012,,867522)	-0.06	-1.04	0.73
GLE1	IV	88248,,89864	-0.07	-1.05	0.77
RAD61	IV	474046,,475989	-0.07	-1.05	0.81
NSE4	IV	272389,,273597	-0.07	-1.05	0.82
CDC13	IV	complement(62244,,65018)	-0.07	-1.05	0.74
PRM7	IV	complement(381985,,384081)	-0.07	-1.05	0.76
YDL144C	IV	complement(198662,,199732)	-0.07	-1.05	0.81
PRP28	IV	complement(948518,,950284)	-0.07	-1.05	0.79
KIN1	IV	694700,,697894	-0.07	-1.05	0.69
TFC6	IV	complement(1196679,,1198697)	-0.07	-1.05	0.74
GUD1	IV	complement(28985,,30454)	-0.07	-1.05	0.82
RPP2B	IV	1239492,,1239824	-0.07	-1.05	0.75
GPI17	IV	1331237,,1332841	-0.07	-1.05	0.71
FPR2	IV	1480425,,1480832	-0.07	-1.05	0.87
YDR161W	IV	779043,,780206	-0.07	-1.05	0.8
ITR1	IV	complement(1443713,,1445467)	-0.07	-1.05	0.69
YDR338C	IV	complement(1147379,,1149466)	-0.07	-1.05	0.76
CMR1	IV	174918,,176486	-0.07	-1.05	0.78
CAB5	IV	complement(850274,,850999)	-0.07	-1.05	0.72
RPS11A	IV	491515,,492324	-0.07	-1.05	0.79
SWI5	IV	complement(748613,,750742)	-0.07	-1.05	0.93
INH1	IV	135179,,135436	-0.07	-1.05	0.78
MRP1	IV	1169178,,1170143	-0.07	-1.05	0.79
TMA64	IV	complement(683946,,685643)	-0.07	-1.05	0.74
SAS4	IV	complement(825910,,827355)	-0.07	-1.05	0.72
BSC2	IV	1012252,,1012959	-0.07	-1.05	0.74
KEI1	IV	1212848,,1213614	-0.08	-1.06	0.8
ARO80	IV	1312040,,1314892	-0.08	-1.06	0.76
SNF1	IV	1412373,,1414274	-0.08	-1.06	0.71
NHP10	IV	complement(446967,,447578)	-0.08	-1.06	0.82
ASF2	IV	complement(104917,,106494)	-0.08	-1.06	0.68
YDL186W	IV	125616,,126449	-0.08	-1.06	0.76
SNF11	IV	592439,,592948	-0.08	-1.06	0.82
THI13	IV	16204,,17226	-0.08	-1.06	0.78
INM2	IV	1035995,,1036873	-0.08	-1.06	0.77
GLO2	IV	1009010,,1009834	-0.08	-1.06	0.7
TAF10	IV	789449,,790069	-0.08	-1.05	0.79
MRPL11	IV	98475,,99224	-0.08	-1.05	0.83
SSN2	IV	complement(1345676,,1349938)	-0.08	-1.05	0.7
APT2	IV	complement(1344517,,1345062)	-0.08	-1.05	0.79
HTB1	IV	complement(914317,,914712)	-0.08	-1.05	0.71
JIP4	IV	complement(1407464,,1410094)	-0.09	-1.07	0.61
GGA1	IV	1190059,,1191732	-0.09	-1.07	0.67
RAM1	IV	complement(295034,,296329)	-0.09	-1.07	0.73
RKM2	IV	complement(852533,,853972)	-0.09	-1.07	0.77
NKP1	IV	complement(1239960,,1240676)	-0.09	-1.07	0.77
TRM1	IV	complement(691549,,693261)	-0.09	-1.07	0.74
YDL012C	IV	complement(431108,,431517)	-0.09	-1.07	0.79
YFH1	IV	245923,,246447	-0.09	-1.07	0.83
LRS4	IV	1339676,,1340719	-0.09	-1.07	0.74
YDR381C-A	IV	complement(1238312,,1238850)	-0.09	-1.07	0.85
LDB17	IV	192750,,194225	-0.09	-1.06	0.81
PMT1	IV	287059,,289512	-0.09	-1.06	0.67
PRP3	IV	complement(1404445,,1405854)	-0.09	-1.06	0.75
HXT7	IV	complement(1154216,,1155928)	-0.09	-1.06	0.68
SSB1	IV	44065,,45906	-0.09	-1.06	0.66
YDR286C	IV	complement(1035231,,1035575)	-0.09	-1.06	0.9
MBP1	IV	352877,,355378	-0.09	-1.06	0.67
REF2	IV	848599,,850200	-0.09	-1.06	0.75
GAL3	IV	463434,,464996	-0.09	-1.06	0.84
RCR2	IV	454122,,454754	-0.09	-1.06	0.64
RAD34	IV	complement(1090433,,1092511)	-0.1	-1.07	0.63
YDR090C	IV	complement(625066,,625998)	-0.1	-1.07	0.69
NUP42	IV	complement(843569,,844861)	-0.1	-1.07	0.68
RMD1	IV	447984,,449276	-0.1	-1.07	0.73
QRI7	IV	complement(273653,,274876)	-0.1	-1.07	0.89
PAL1	IV	complement(1170326,,1171825)	-0.1	-1.07	0.62
MFG1	IV	36797,,38173	-0.1	-1.07	0.7
RPS13	IV	579458,,580452	-0.1	-1.07	0.58
HEM13	IV	546642,,547628	-0.1	-1.07	0.66
UGX2	IV	complement(158064,,158735)	-0.1	-1.07	0.68
RSM28	IV	1436930,,1438015	-0.1	-1.07	0.62
CTS2	IV	1219413,,1220948	-0.1	-1.07	0.71
IWR1	IV	complement(253995,,255126)	-0.1	-1.07	0.56
YDR387C	IV	complement(1248154,,1249821)	-0.1	-1.07	0.78
YDL057W	IV	351434,,352420	-0.11	-1.08	0.69
YDR261W-B	IV	981462,,986775	-0.11	-1.08	0.81
RRP45	IV	1020747,,1021664	-0.11	-1.08	0.69
TGL2	IV	complement(567723,,568703)	-0.11	-1.08	0.67
CCT6	IV	836421,,838061	-0.11	-1.08	0.59
GIC2	IV	complement(1079048,,1080199)	-0.11	-1.08	0.67
RRP17	IV	1294693,,1295400	-0.11	-1.08	0.76
TRP4	IV	1184747,,1185889	-0.11	-1.08	0.79
MTQ2	IV	734138,,734803	-0.11	-1.08	0.67
LCD1	IV	1447830,,1450073	-0.11	-1.08	0.62
YDR514C	IV	complement(1471548,,1472999)	-0.11	-1.08	0.69
SVF1	IV	complement(1167214,,1168659)	-0.11	-1.08	0.6
SPT3	IV	1258696,,1259709	-0.11	-1.08	0.65
TVP15	IV	655013,,655444	-0.11	-1.08	0.76
CCT4	IV	199996,,201582	-0.11	-1.08	0.6
MUS81	IV	1246084,,1247982	-0.12	-1.09	0.63
FCF1	IV	complement(1149951,,1150520)	-0.12	-1.09	0.7
KRS1	IV	525440,,527215	-0.12	-1.09	0.58
DTD1	IV	65242,,65765	-0.12	-1.09	0.81
ALT2	IV	complement(678241,,679764)	-0.12	-1.09	0.59
XRS2	IV	complement(1215016,,1217580)	-0.12	-1.09	0.62
PTC1	IV	439909,,440754	-0.12	-1.09	0.67
MCM21	IV	1103758,,1104947	-0.12	-1.09	0.7
WIP1	IV	1224757,,1225026	-0.12	-1.09	0.79
VPS52	IV	1422763,,1424688	-0.12	-1.09	0.54
BFR2	IV	1059627,,1061231	-0.12	-1.08	0.67
HEM3	IV	complement(92762,,93745)	-0.12	-1.08	0.61
HOM2	IV	770357,,771454	-0.12	-1.08	0.54
YPQ2	IV	1181801,,1182754	-0.13	-1.1	0.66
RBS1	IV	122216,,123589	-0.13	-1.09	0.63
YCG1	IV	1117126,,1120233	-0.13	-1.09	0.52
RPS16B	IV	complement(306926,,307789)	-0.13	-1.09	0.6
IVY1	IV	924785,,926146	-0.14	-1.11	0.64
YDR183C-A	IV	complement(830397,,830654)	-0.14	-1.1	0.9
RAD30	IV	1303174,,1305072	-0.14	-1.1	0.67
GRX3	IV	complement(644178,,645035)	-0.14	-1.1	0.61
SLX5	IV	429067,,430926	-0.14	-1.1	0.52
CPR1	IV	complement(768512,,769000)	-0.14	-1.1	0.5
DAS2	IV	complement(485746,,486444)	-0.14	-1.1	0.83
BTT1	IV	963412,,963861	-0.14	-1.1	0.83
SSS1	IV	complement(616928,,617170)	-0.14	-1.1	0.77
UTP4	IV	complement(1114433,,1116763)	-0.14	-1.1	0.6
YDR541C	IV	complement(1519664,,1520698)	-0.14	-1.1	0.72
ATC1	IV	complement(830629,,831513)	-0.14	-1.1	0.7
AIR2	IV	complement(144484,,145518)	-0.14	-1.1	0.64
GPI8	IV	1129588,,1130823	-0.14	-1.1	0.64
ARX1	IV	complement(655686,,657467)	-0.14	-1.1	0.53
ACK1	IV	complement(96082,,97953)	-0.15	-1.11	0.61
RPL4B	IV	471853,,472941	-0.15	-1.11	0.63
YDR109C	IV	complement(673520,,675667)	-0.15	-1.11	0.53
SLU7	IV	complement(618497,,619645)	-0.15	-1.11	0.58
CDC36	IV	164290,,164865	-0.15	-1.11	0.6
SRP14	IV	292781,,293221	-0.16	-1.12	0.71
CWC21	IV	complement(1420431,,1420838)	-0.16	-1.12	0.73
MTF2	IV	complement(373967,,375289)	-0.16	-1.12	0.61
YDR433W	IV	1329600,,1330040	-0.16	-1.12	0.74
STE5	IV	658350,,661103	-0.16	-1.12	0.59
RPA14	IV	769525,,769938	-0.16	-1.12	0.6
HIM1	IV	1102184,,1103428	-0.16	-1.12	0.6
RMT2	IV	complement(1393336,,1394574)	-0.16	-1.12	0.47
RVB1	IV	complement(840604,,841995)	-0.16	-1.12	0.48
STN1	IV	610441,,611925	-0.16	-1.12	0.57
CDC1	IV	827582,,829057	-0.16	-1.12	0.5
NHP2	IV	87512,,87982	-0.16	-1.11	0.59
YDR115W	IV	682175,,682492	-0.16	-1.11	0.68
NSI1	IV	complement(492556,,494268)	-0.17	-1.13	0.48
PSA1	IV	complement(355674,,356759)	-0.17	-1.13	0.39
MGT1	IV	complement(100501,,101067)	-0.17	-1.13	0.67
SRP101	IV	complement(1043146,,1045011)	-0.17	-1.13	0.48
OMS1	IV	1093763,,1095178	-0.17	-1.13	0.59
PST1	IV	563527,,564861	-0.17	-1.13	0.56
YDL121C	IV	complement(245133,,245582)	-0.17	-1.12	0.64
MRPL35	IV	1110589,,1111692	-0.17	-1.12	0.6
SWF1	IV	703234,,704244	-0.17	-1.12	0.75
YDR415C	IV	complement(1297037,,1298161)	-0.17	-1.12	0.57
SHU2	IV	complement(602198,,602869)	-0.17	-1.12	0.65
PLP1	IV	829585,,830277	-0.17	-1.12	0.65
BNA7	IV	complement(1323454,,1324239)	-0.17	-1.12	0.76
MRPL1	IV	complement(682724,,683581)	-0.18	-1.14	0.58
SPS1	IV	complement(1485566,,1487038)	-0.18	-1.13	0.53
HST4	IV	842337,,843449	-0.18	-1.13	0.54
UGO1	IV	complement(1399706,,1401214)	-0.18	-1.13	0.57
MRPL7	IV	936615,,937493	-0.18	-1.13	0.56
BPL1	IV	203039,,205111	-0.18	-1.13	0.5
FAP7	IV	complement(163449,,164042)	-0.18	-1.13	0.71
MRPL28	IV	1386073,,1386516	-0.19	-1.14	0.61
YDR131C	IV	complement(716790,,718460)	-0.19	-1.14	0.52
IZH1	IV	1434924,,1435874	-0.19	-1.14	0.56
SHR3	IV	78426,,79058	-0.19	-1.14	0.54
YDR336W	IV	1145092,,1146036	-0.2	-1.15	0.56
RIB3	IV	complement(1428354,,1428980)	-0.2	-1.15	0.51
CWC15	IV	781423,,781950	-0.2	-1.15	0.59
NBP2	IV	complement(780390,,781100)	-0.2	-1.15	0.51
PUS9	IV	complement(387513,,388901)	-0.2	-1.15	0.5
ARP2	IV	399340,,400638	-0.2	-1.15	0.42
MSW1	IV	1004004,,1005143	-0.2	-1.15	0.51
GIR2	IV	765706,,766503	-0.2	-1.15	0.44
HPR1	IV	730578,,732836	-0.2	-1.15	0.39
PHO13	IV	32296,,33234	-0.2	-1.15	0.6
ESF1	IV	complement(1204497,,1206383)	-0.2	-1.14	0.48
PUF6	IV	complement(1441433,,1443403)	-0.21	-1.16	0.41
UGA4	IV	84270,,85985	-0.21	-1.16	0.51
NOP1	IV	427364,,428347	-0.21	-1.16	0.36
OCA6	IV	complement(582791,,583465)	-0.21	-1.16	0.47
RRP8	IV	612073,,613251	-0.21	-1.16	0.41
YDR249C	IV	complement(958681,,959802)	-0.21	-1.15	0.55
RPC11	IV	complement(547978,,548310)	-0.21	-1.15	0.81
VBA4	IV	688227,,690533	-0.22	-1.17	0.47
FMN1	IV	complement(935236,,935892)	-0.22	-1.17	0.65
SSY1	IV	776163,,778721	-0.23	-1.17	0.37
YRF1-1	IV	1526321,,1531711	-0.23	-1.17	0.51
CNL1	IV	complement(1189199,,1189567)	-0.23	-1.17	0.61
KNH1	IV	complement(365068,,365874)	-0.23	-1.17	0.69
YDR535C	IV	complement(1506606,,1507362)	-0.23	-1.17	0.69
GPI11	IV	1067731,,1068390	-0.23	-1.17	0.52
ERD1	IV	complement(1295598,,1296686)	-0.24	-1.18	0.63
YDL211C	IV	complement(79294,,80412)	-0.24	-1.18	0.61
LRG1	IV	22823,,25876	-0.25	-1.19	0.43
RAD9	IV	complement(899551,,903480)	-0.26	-1.2	0.32
DAD4	IV	complement(1108280,,1108498)	-0.26	-1.2	0.73
YDR282C	IV	complement(1023511,,1024755)	-0.26	-1.2	0.46
SLC1	IV	complement(362672,,363583)	-0.26	-1.19	0.59
YAP6	IV	complement(974631,,975782)	-0.27	-1.21	0.4
NCB2	IV	complement(1266366,,1266898)	-0.27	-1.21	0.64
DPP1	IV	complement(1030550,,1031419)	-0.27	-1.2	0.45
SNU23	IV	complement(284581,,285165)	-0.28	-1.21	0.49
SAS10	IV	complement(181186,,183018)	-0.28	-1.21	0.31
RUB1	IV	complement(733618,,733924)	-0.29	-1.23	0.81
YDR401W	IV	1272223,,1272786	-0.29	-1.23	0.81
DBP10	IV	394217,,397204	-0.3	-1.23	0.25
TMN2	IV	complement(669016,,671034)	-0.3	-1.23	0.26
YDL172C	IV	complement(148607,,149086)	-0.31	-1.24	0.69
DIG2	IV	1417399,,1418370	-0.31	-1.24	0.38
INO2	IV	complement(698554,,699468)	-0.31	-1.24	0.4
PRP11	IV	complement(375680,,376480)	-0.33	-1.26	0.57
MRP10	IV	372248,,372535	-0.34	-1.27	0.65
SAC7	IV	1252537,,1254501	-0.35	-1.28	0.23
YDL119C	IV	complement(246689,,247612)	-0.37	-1.3	0.63
HXT3	IV	complement(1162957,,1164660)	-0.4	-1.32	0.33
TRM8	IV	99561,,100421	-0.41	-1.33	0.38
DYN2	IV	complement(1319387,,1319841)	-0.41	-1.33	0.51
PHM6	IV	complement(1022007,,1022321)	-0.43	-1.35	0.58
PRP9	IV	397537,,399129	-0.43	-1.35	0.26
YDL022C-A	IV	complement(409808,,410056)	-0.45	-1.36	0.67
YDL007C-A	IV	complement(436567,,436824)	-0.49	-1.4	0.62
YDL228C	IV	complement(45277,,45918)	-0.61	-1.52	0.75
YDL086C-A	IV	complement(301655,,302089)	-0.61	-1.52	0.75
YDR102C	IV	complement(657648,,657980)	-0.61	-1.52	0.75
VPS61	IV	complement(727711,,728283)	-0.61	-1.52	0.75
YDR246W-A	IV	955133,,955333	-0.61	-1.52	0.75
YDR250C	IV	complement(960086,,960361)	-0.61	-1.52	0.75
YDR413C	IV	complement(1294836,,1295411)	-0.61	-1.52	0.75
YDR467C	IV	complement(1397583,,1397909)	-0.61	-1.52	0.75
YDR491C	IV	complement(1434500,,1434991)	-0.61	-1.52	0.75
HO	IV	complement(46271,,48031)	-0.66	-1.58	0.67
YDL221W	IV	62011,,62562	-0.66	-1.58	0.67
YDL196W	IV	106741,,107070	-0.66	-1.58	0.67
TFB5	IV	complement(603593,,603811)	-0.66	-1.58	0.67
YDR193W	IV	844554,,844952	-0.66	-1.58	0.67
YDR526C	IV	complement(1491075,,1491545)	-0.66	-1.58	0.67
HXT15	IV	complement(11657,,13360)	-0.68	-1.61	0.62
YDR210W-B	IV	872112,,877425	-0.68	-1.61	0.62
PAU10	IV	1523249,,1523611	-0.68	-1.61	0.62
YDR215C	IV	complement(894089,,894502)	-0.78	-1.72	0.44
BUD30	IV	complement(183318..183899)	-6.96436	-124.877	4.5784e-07
ENA2	IV	complement(531307..534582)	-7.33379	-161.321	1.27665e-09
YIL177W-A	IX	846,,1328	0.78	1.72	0.65
RNR3	IX	complement(238099,,240708)	0.61	1.52	0.13
CSM2	IX	complement(99860,,100501)	0.47	1.39	0.51
DPH1	IX	171751,,173028	0.44	1.36	0.31
AIM19	IX	complement(199646,,200119)	0.42	1.34	0.33
DFG10	IX	260158,,260919	0.4	1.32	0.66
YIL169C	IX	complement(23119,,26106)	0.38	1.3	0.15
MMF1	IX	complement(257843,,258280)	0.33	1.26	0.39
YIL014C-A	IX	complement(325212,,325526)	0.32	1.25	0.59
IST3	IX	364889,,365335	0.27	1.2	0.77
EST3	IX	complement(335666,,336212)	0.27	1.2	0.79
PRM2	IX	complement(283029,,284999)	0.27	1.21	0.65
SNL1	IX	321454,,321933	0.27	1.21	0.65
RGI2	IX	complement(247902,,248396)	0.25	1.19	0.3
DAL2	IX	410807,,411838	0.24	1.18	0.37
POT1	IX	complement(40191,,41444)	0.23	1.17	0.47
SPO22	IX	complement(222937,,225954)	0.21	1.15	0.49
SNP1	IX	complement(244657,,245559)	0.21	1.16	0.49
MET28	IX	complement(383556,,384119)	0.21	1.16	0.48
GVP36	IX	276525,,277505	0.21	1.16	0.35
AYR1	IX	126204,,127097	0.2	1.15	0.39
SGN1	IX	complement(356143,,356895)	0.2	1.15	0.51
PFK26	IX	complement(163278,,165761)	0.19	1.14	0.37
SUC2	IX	37385,,38983	0.19	1.14	0.51
HOP1	IX	226602,,228419	0.19	1.14	0.46
FAF1	IX	315093,,316133	0.19	1.14	0.5
YIL030W-A	IX	295565,,295903	0.18	1.13	0.45
YIR016W	IX	382628,,383425	0.18	1.13	0.45
ULP2	IX	292633,,295737	0.18	1.14	0.5
YIL001W	IX	353940,,355481	0.17	1.12	0.55
FYV10	IX	180427,,181977	0.17	1.13	0.34
PAN6	IX	complement(76354,,77283)	0.17	1.13	0.68
GPP1	IX	255115,,255867	0.16	1.12	0.6
NDC80	IX	78074,,80149	0.15	1.11	0.51
SSM4	IX	complement(296050,,300009)	0.15	1.11	0.51
IMA3	IX	complement(16784,,18553)	0.14	1.1	0.79
YIL071W-A	IX	228550,,229026	0.14	1.11	0.62
YIL077C	IX	complement(214991,,215953)	0.13	1.09	0.55
CAP2	IX	complement(289226,,290089)	0.13	1.09	0.56
CFD1	IX	349122,,350003	0.13	1.09	0.69
DJP1	IX	363221,,364519	0.13	1.09	0.63
PIG2	IX	271161,,272777	0.13	1.09	0.52
AXL2	IX	85366,,87837	0.13	1.1	0.73
NEO1	IX	261437,,264892	0.12	1.08	0.56
RPL16A	IX	complement(98527,,99416)	0.12	1.09	0.59
KGD1	IX	122689,,125733	0.12	1.09	0.65
CAB2	IX	complement(203556,,204653)	0.12	1.09	0.61
VHR1	IX	249991,,251913	0.11	1.08	0.53
MET18	IX	113806,,116904	0.11	1.08	0.55
VHS2	IX	complement(95065,,96375)	0.1	1.07	0.6
PDR11	IX	complement(328207,,332442)	0.1	1.07	0.63
NAS2	IX	complement(342994,,343656)	0.09	1.06	0.61
VID28	IX	complement(318200,,320965)	0.09	1.06	0.65
DAL1	IX	complement(406260,,407642)	0.09	1.06	0.85
ARC15	IX	complement(243998,,244462)	0.09	1.06	0.7
INP51	IX	complement(350591,,353431)	0.09	1.07	0.65
POR2	IX	complement(149143,,149988)	0.08	1.06	0.83
DAL7	IX	complement(413015,,414679)	0.08	1.06	0.87
TIR3	IX	333727,,334536	0.07	1.05	0.7
RPL40A	IX	68708,,69528	0.07	1.05	0.76
MAM33	IX	complement(230272,,231072)	0.07	1.05	0.83
MET30	IX	268651,,270573	0.07	1.05	0.67
RPN2	IX	complement(217863,,220700)	0.07	1.05	0.82
GTT1	IX	complement(423809,,424513)	0.07	1.05	0.82
TAO3	IX	complement(106107,,113237)	0.07	1.05	0.76
RRD1	IX	55198,,56379	0.06	1.04	0.82
THS1	IX	212499,,214703	0.06	1.04	0.78
STS1	IX	complement(377287,,378246)	0.06	1.05	0.72
YIL152W	IX	56545,,57252	0.06	1.05	0.86
IRR1	IX	complement(304477,,307929)	0.05	1.04	0.8
KTR7	IX	complement(200490,,202043)	0.04	1.03	0.83
MCM10	IX	complement(61013,,62728)	0.04	1.03	0.89
RPI1	IX	complement(136654,,137877)	0.04	1.03	0.89
YIL055C	IX	complement(252042,,253925)	0.04	1.03	0.83
SDS3	IX	complement(202276,,203259)	0.04	1.03	0.89
FIS1	IX	complement(241308,,241775)	0.03	1.02	0.9
FKH1	IX	complement(100781,,102235)	0.03	1.02	0.94
CCT2	IX	83302,,84885	0.03	1.02	0.91
SEC11	IX	398733,,399236	0.03	1.02	0.91
PCI8	IX	complement(228660,,229994)	0.03	1.02	0.92
HYR1	IX	423128,,423619	0.03	1.02	0.87
YRB2	IX	complement(242761,,243744)	0.03	1.02	0.89
BCY1	IX	complement(290419,,291669)	0.03	1.02	0.88
INA22	IX	complement(402841,,403491)	0.02	1.01	0.96
YIR042C	IX	complement(435273,,435983)	0.02	1.01	0.96
PRM5	IX	complement(140613,,141569)	0.02	1.01	0.94
RRT14	IX	complement(117024,,117644)	0.02	1.02	0.9
ATG32	IX	complement(74184,,75773)	0.02	1.02	0.92
XBP1	IX	complement(175307,,177250)	0.01	1.01	0.94
EPS1	IX	345692,,347797	0.01	1.01	0.95
NOT3	IX	complement(280142,,282652)	0.01	1.01	0.93
YIR020C	IX	complement(394255,,394557)	0.01	1.01	0.99
YIL156W-B	IX	47690,,47973	0.01	1.01	0.99
TED1	IX	278426,,279847	0.00798	1.01	0.97
YIL108W	IX	160887,,162977	0.00577	1	0.98
RPB3	IX	312905,,313861	0.0055	1	0.98
REV7	IX	complement(87979,,88716)	0.0032	1	0.99
SLM1	IX	complement(167581,,169641)	0.000502	1	1
YIA6	IX	344062,,345183	-0.00287	-1	0.99
PRI1	IX	complement(373077,,374306)	-0.00436	-1	0.99
LYS12	IX	complement(186517,,187632)	-0.00454	-1	0.98
YIL024C	IX	complement(308602,,309171)	-0.00461	-1	0.98
RHO3	IX	139752,,140447	-0.0056	-1	0.99
CBR1	IX	complement(274072,,274926)	-0.00987	-1.01	0.96
YIR035C	IX	complement(421026,,421790)	-0.01	-1.01	0.98
NUP159	IX	complement(144327,,148709)	-0.01	-1.01	0.94
MLP2	IX	complement(63028,,68067)	-0.01	-1.01	0.97
MGA2	IX	416124,,419465	-0.01	-1.01	0.95
MNT3	IX	326103,,327995	-0.01	-1.01	0.95
YAP5	IX	384609,,385346	-0.01	-1.01	0.97
RPS24B	IX	complement(231553,,232369)	-0.02	-1.02	0.94
FLO11	IX	complement(389572,,393675)	-0.02	-1.02	0.9
PCL7	IX	258913,,259770	-0.02	-1.02	0.92
RPL2B	IX	316768,,317932	-0.02	-1.02	0.9
CST6	IX	285666,,287429	-0.02	-1.01	0.93
URM1	IX	342536,,342835	-0.02	-1.01	0.98
EMC5	IX	complement(303679,,304104)	-0.02	-1.01	0.94
SSL2	IX	complement(80510,,83041)	-0.02	-1.01	0.91
IMP2'	IX	complement(53981,,55021)	-0.02	-1.01	0.91
BNR1	IX	41825,,45952	-0.03	-1.02	0.89
PAN1	IX	complement(365466,,369908)	-0.03	-1.02	0.86
CKA1	IX	complement(287790,,288908)	-0.03	-1.02	0.92
ICE2	IX	193595,,195070	-0.03	-1.02	0.92
OM45	IX	93619,,94800	-0.04	-1.03	0.81
SYG1	IX	complement(265115,,267823)	-0.04	-1.03	0.84
YIL161W	IX	39433,,40140	-0.04	-1.03	0.87
TPM2	IX	complement(89230,,89715)	-0.04	-1.03	0.83
DOT5	IX	334882,,335529	-0.04	-1.03	0.9
STH1	IX	117992,,122071	-0.04	-1.03	0.8
MPH1	IX	complement(357415,,360396)	-0.05	-1.04	0.81
FLX1	IX	97395,,98330	-0.05	-1.03	0.96
YIL059C	IX	complement(246550,,246915)	-0.05	-1.03	0.96
UBP7	IX	48091,,51306	-0.05	-1.03	0.85
APQ12	IX	277723,,278139	-0.05	-1.03	0.9
SEC24	IX	complement(157385,,160165)	-0.05	-1.03	0.8
HIS5	IX	142928,,144085	-0.06	-1.05	0.82
GUT2	IX	complement(51759,,53708)	-0.06	-1.04	0.76
YKE4	IX	complement(309386,,310426)	-0.06	-1.04	0.83
TMA108	IX	complement(89948,,92788)	-0.06	-1.04	0.76
RPR2	IX	381948,,382382	-0.06	-1.04	0.83
COA1	IX	complement(46949,,47542)	-0.06	-1.04	0.86
AIM21	IX	360885,,362924	-0.07	-1.05	0.73
QDR2	IX	132244,,133872	-0.07	-1.05	0.8
DAL4	IX	408468,,410375	-0.07	-1.05	0.93
ASG1	IX	102782,,105676	-0.07	-1.05	0.8
HIS6	IX	complement(314035,,314820)	-0.07	-1.05	0.8
AGE2	IX	complement(272950,,273846)	-0.07	-1.05	0.78
ESL1	IX	complement(57338,,60694)	-0.08	-1.06	0.75
TIM44	IX	311165,,312460	-0.08	-1.06	0.68
DAL81	IX	399777,,402689	-0.08	-1.06	0.68
HOS4	IX	151595,,154846	-0.08	-1.05	0.72
COX5B	IX	155222,,155765	-0.09	-1.07	0.72
AVT7	IX	complement(197931,,199403)	-0.09	-1.07	0.73
BET1	IX	complement(347946,,348505)	-0.09	-1.07	0.85
YIL092W	IX	189066,,190967	-0.09	-1.06	0.74
PKP1	IX	complement(275108,,276292)	-0.09	-1.06	0.72
YIL165C	IX	complement(33718,,34077)	-0.1	-1.08	0.88
SDP1	IX	150559,,151188	-0.1	-1.07	0.89
POG1	IX	130610,,131665	-0.11	-1.08	0.7
RPL34B	IX	complement(256226,,257063)	-0.11	-1.08	0.69
MND2	IX	403659,,404765	-0.11	-1.08	0.57
SEC28	IX	216658,,217548	-0.11	-1.08	0.67
YPS6	IX	complement(430498,,432111)	-0.11	-1.08	0.69
QDR1	IX	134417,,136108	-0.11	-1.08	0.76
UTP25	IX	complement(191030,,193195)	-0.12	-1.09	0.64
YIR007W	IX	370704,,372998	-0.12	-1.09	0.6
IRC24	IX	complement(422074,,422865)	-0.12	-1.09	0.61
BMT5	IX	complement(182117,,183127)	-0.12	-1.09	0.79
YIL047C-A	IX	complement(265099,,265467)	-0.12	-1.09	0.79
SLN1	IX	complement(69791,,73453)	-0.13	-1.09	0.58
YIL141W	IX	85053,,85442	-0.13	-1.09	0.93
YIL060W	IX	246392,,246826	-0.13	-1.09	0.93
YIL067C	IX	complement(235724,,237760)	-0.13	-1.09	0.62
SIM1	IX	128151,,129581	-0.14	-1.1	0.54
SER33	IX	complement(221081,,222490)	-0.14	-1.1	0.6
YVH1	IX	complement(404873,,405967)	-0.14	-1.1	0.71
LYS1	IX	complement(419615,,420736)	-0.17	-1.13	0.57
RSM25	IX	complement(187990,,188784)	-0.17	-1.12	0.65
PRK1	IX	183937,,186369	-0.17	-1.12	0.56
SHQ1	IX	complement(169982,,171505)	-0.18	-1.13	0.69
YIL082W-A	IX	205635,,210132	-0.18	-1.13	0.63
MRS1	IX	397294,,398385	-0.19	-1.14	0.79
MSL1	IX	374525,,374860	-0.2	-1.15	0.73
FAA3	IX	339344,,341428	-0.2	-1.15	0.5
NIT1	IX	complement(34087,,34686)	-0.21	-1.16	0.69
FMC1	IX	complement(179772,,180239)	-0.21	-1.15	0.68
YIL029C	IX	complement(300829,,301257)	-0.21	-1.15	0.8
YIL166C	IX	complement(30938,,32566)	-0.22	-1.16	0.65
EFM4	IX	241943,,242716	-0.22	-1.16	0.65
AIR1	IX	complement(210923,,212005)	-0.22	-1.16	0.69
SGA1	IX	178004,,179653	-0.23	-1.17	0.45
BAR1	IX	322342,,324105	-0.24	-1.18	0.76
SQT1	IX	378486,,379781	-0.25	-1.19	0.31
MOB1	IX	166415,,167444	-0.26	-1.2	0.38
HPM1	IX	156045,,157178	-0.31	-1.24	0.38
YIR014W	IX	381086,,381814	-0.33	-1.26	0.37
SEC6	IX	complement(233057,,235474)	-0.38	-1.3	0.23
DSN1	IX	375431,,377161	-0.41	-1.33	0.29
AIM20	IX	46201,,46815	-0.45	-1.36	0.67
YIL089W	IX	195599,,196216	-0.49	-1.4	0.62
YIL163C	IX	complement(36899,,37252)	-0.61	-1.52	0.75
YIL032C	IX	complement(291961,,292317)	-0.61	-1.52	0.75
YIL028W	IX	302100,,302498	-0.61	-1.52	0.75
YIL025C	IX	complement(308201,,308575)	-0.61	-1.52	0.75
YIL002W-A	IX	350301,,350510	-0.61	-1.52	0.75
YIR023C-A	IX	complement(402383,,402706)	-0.61	-1.52	0.75
YIR030W-A	IX	412899,,413282	-0.61	-1.52	0.75
DAL3	IX	complement(415030,,415617)	-0.68	-1.61	0.62
Q0182	Mito	65770,,66174	0.26	1.2	0.84
VAR1	Mito	48901,,50097	0.17	1.12	0.77
AI5_BETA	Mito	24156,,25255	-0.01	-1.01	0.97
OLI1	Mito	46723,,46953	-0.02	-1.01	0.94
BI3	Mito	36540,,40265	-0.05	-1.03	0.91
ATP6	Mito	28487,,29266	-0.06	-1.04	0.74
COX1	Mito	13818,,26701	-0.09	-1.07	0.75
Q0255	Mito	74495,,75984	-0.09	-1.06	0.76
COB	Mito	36540,,43647	-0.1	-1.08	0.73
21S_RRNA	Mito	58009,,62447	-0.1	-1.07	0.75
AI4	Mito	13818,,21935	-0.12	-1.09	0.58
COX2	Mito	73758,,74513	-0.12	-1.09	0.68
BI4	Mito	36540,,42251	-0.14	-1.1	0.49
AI3	Mito	13818,,19996	-0.18	-1.14	0.55
BI2	Mito	36540,,38579	-0.2	-1.15	0.53
SCEI	Mito	61022,,61729	-0.23	-1.17	0.48
COX3	Mito	79213,,80022	-0.23	-1.17	0.35
AI1	Mito	13818,,16322	-0.25	-1.19	0.41
Q0032	Mito	11667,,11957	-0.61	-1.52	0.75
Q0144	Mito	54109,,54438	-0.61	-1.52	0.75
AI5_ALPHA	Mito	13818,,23167	-0.66	-1.58	0.66
URA3	V	116167,,116970	1.56	2.95	0.13
UTR5	V	complement(85045,,85545)	0.82	1.76	0.55
YER046W-A	V	243700,,244029	0.78	1.72	0.65
YER066C-A	V	complement(291703,,292203)	0.78	1.72	0.65
YER097W	V	355140,,355469	0.78	1.72	0.65
TCA17	V	complement(64709,,65167)	0.58	1.49	0.57
YEL034C-A	V	complement(85613,,86215)	0.57	1.48	0.67
DLD3	V	16355,,17845	0.47	1.38	0.12
AST2	V	complement(360502,,361794)	0.44	1.36	0.19
PET117	V	271768,,272091	0.43	1.35	0.65
FCY21	V	274567,,276153	0.43	1.35	0.65
YER121W	V	402375,,402719	0.43	1.35	0.65
SIT1	V	27657,,29543	0.38	1.3	0.13
YEL057C	V	complement(45020,,45721)	0.38	1.3	0.65
RPS8B	V	363100,,363702	0.34	1.27	0.22
YEL073C	V	complement(7230,,7553)	0.33	1.26	0.61
TDA2	V	complement(301947,,302327)	0.32	1.25	0.59
FRD1	V	complement(65385,,66797)	0.32	1.25	0.3
RTR1	V	complement(450563,,451243)	0.31	1.24	0.4
YEL067C	V	complement(26189,,26776)	0.27	1.2	0.77
RAD51	V	349980,,351182	0.25	1.19	0.25
YER152W-A	V	473485,,474051	0.25	1.19	0.88
YER190C-A	V	complement(574804,,575379)	0.25	1.19	0.88
BMH1	V	545611,,546414	0.24	1.18	0.29
RPS26B	V	423952,,424311	0.24	1.18	0.6
RRT13	V	290242,,290799	0.24	1.18	0.64
MTC7	V	86179,,86598	0.23	1.17	0.41
MXR1	V	234937,,235491	0.21	1.15	0.52
SPR6	V	complement(394292,,394867)	0.21	1.15	0.52
PDA1	V	546817,,548079	0.2	1.15	0.4
PTP3	V	complement(308413,,311199)	0.19	1.14	0.41
HVG1	V	complement(228456,,229205)	0.19	1.14	0.61
MNN1	V	153520,,155808	0.18	1.13	0.42
KRE29	V	complement(226858,,228252)	0.18	1.13	0.61
RMD6	V	13720,,14415	0.18	1.13	0.82
FAA2	V	184541,,186775	0.18	1.13	0.58
YEL076C	V	complement(4464,,5114)	0.18	1.14	0.63
RPN3	V	196948,,198519	0.17	1.12	0.48
YAT2	V	202192,,204963	0.17	1.12	0.55
PRB1	V	complement(40046,,41953)	0.17	1.13	0.57
SWI4	V	complement(382595,,385876)	0.17	1.13	0.46
ISC10	V	complement(549724,,550527)	0.16	1.11	0.68
MOT2	V	293050,,294813	0.16	1.11	0.62
YEL009C-A	V	complement(136371,,136778)	0.16	1.12	0.83
DDI1	V	456319,,457605	0.16	1.12	0.36
VAB2	V	complement(145907,,146755)	0.16	1.12	0.72
YOS1	V	307653,,308123	0.16	1.12	0.72
SLX8	V	complement(395348,,396172)	0.14	1.1	0.57
DSF1	V	19589,,21097	0.14	1.1	0.79
GPP2	V	complement(279930,,280682)	0.14	1.1	0.65
GCN4	V	complement(138918,,139763)	0.13	1.09	0.64
NPR2	V	34407,,36254	0.13	1.09	0.65
VFA1	V	415859,,416470	0.13	1.09	0.74
HMF1	V	complement(270737,,271126)	0.13	1.1	0.71
SER3	V	322686,,324095	0.13	1.1	0.55
GLC7	V	432495,,433958	0.13	1.1	0.49
FTR1	V	complement(460526,,461740)	0.12	1.09	0.65
RAD24	V	536300,,538279	0.12	1.09	0.67
GCG1	V	complement(503084,,503782)	0.11	1.08	0.76
SPI1	V	468370,,468816	0.11	1.08	0.62
FMP52	V	159580,,160275	0.11	1.08	0.56
GDI1	V	439616,,440971	0.11	1.08	0.54
ACA1	V	complement(240032,,241501)	0.11	1.08	0.71
SRB4	V	198812,,200875	0.1	1.07	0.58
EDC2	V	222639,,223076	0.1	1.07	0.59
RGI1	V	292066,,292551	0.1	1.07	0.64
SHC1	V	351698,,353236	0.09	1.06	0.62
ADK2	V	525974,,526651	0.09	1.06	0.85
HIS1	V	complement(264892,,265785)	0.09	1.06	0.84
HEM14	V	182600,,184219	0.09	1.06	0.66
NTF2	V	172115,,172492	0.09	1.07	0.73
PUP3	V	complement(348729,,349346)	0.09	1.07	0.65
MAM1	V	372326,,373234	0.08	1.05	0.79
PMI40	V	complement(157736,,159118)	0.08	1.05	0.73
YEL077C	V	complement(264,,4097)	0.08	1.06	0.65
PRE1	V	177835,,178431	0.08	1.06	0.71
RPL34A	V	complement(269423,,270185)	0.08	1.06	0.8
SCS2	V	401135,,401869	0.07	1.05	0.69
BRR2	V	complement(529530,,536021)	0.07	1.05	0.74
PRO3	V	201076,,201936	0.07	1.05	0.71
ARB1	V	complement(223367,,225199)	0.07	1.05	0.81
RTT105	V	366802,,367428	0.06	1.04	0.82
SHO1	V	complement(397952,,399055)	0.06	1.04	0.83
SAK1	V	417281,,420709	0.06	1.04	0.79
UBP9	V	355466,,357730	0.06	1.04	0.77
PAC2	V	164527,,166083	0.05	1.03	0.87
RPS24A	V	306323,,307196	0.05	1.03	0.79
RSP5	V	410189,,412618	0.05	1.03	0.83
MMS21	V	complement(120498,,121301)	0.05	1.03	0.9
YER010C	V	complement(172634,,173338)	0.05	1.03	0.8
GLC3	V	133120,,135234	0.05	1.03	0.85
NUP157	V	complement(367838,,372013)	0.05	1.03	0.82
YEL020C	V	complement(118617,,120299)	0.05	1.04	0.84
GDA1	V	73771,,75327	0.05	1.04	0.8
RAD4	V	complement(500630,,502894)	0.05	1.04	0.79
AFG1	V	56571,,58100	0.05	1.04	0.85
GEA2	V	111421,,115800	0.05	1.04	0.86
RAD23	V	complement(81407,,82603)	0.05	1.04	0.8
YEL068C	V	complement(25646,,25978)	0.05	1.04	0.95
KAP123	V	complement(378762,,382103)	0.04	1.02	0.86
RPL12A	V	complement(52721,,53218)	0.04	1.03	0.85
YER186C	V	complement(561705,,562625)	0.04	1.03	0.89
YND1	V	160550,,162442	0.04	1.03	0.83
SSA4	V	364589,,366517	0.04	1.03	0.9
GIM4	V	148176,,148599	0.03	1.02	0.92
TMA20	V	complement(166237,,166885)	0.03	1.02	0.9
YCK3	V	404813,,406387	0.03	1.02	0.87
GET2	V	complement(326174,,327031)	0.03	1.02	0.89
BOI2	V	complement(390590,,393712)	0.03	1.02	0.88
WBP1	V	complement(148722,,150014)	0.03	1.02	0.88
UBC8	V	131772,,132551	0.03	1.02	0.87
CIN8	V	complement(36535,,39537)	0.03	1.02	0.88
AFG3	V	complement(189503,,191788)	0.03	1.02	0.88
PHM8	V	225889,,226854	0.03	1.02	0.88
CCA1	V	complement(521029,,522669)	0.03	1.02	0.89
YER156C	V	complement(483325,,484341)	0.02	1.01	0.91
MAG1	V	complement(455146,,456036)	0.02	1.01	0.92
YEA6	V	144327,,145334	0.02	1.01	0.93
YEL025C	V	complement(102581,,106147)	0.02	1.01	0.93
RNR1	V	298950,,301616	0.02	1.01	0.95
PAB1	V	510373,,512106	0.02	1.01	0.94
TMT1	V	complement(539464,,540363)	0.02	1.01	0.96
VMA3	V	100769,,101251	0.02	1.02	0.9
PAU2	V	63728,,64090	0.01	1.01	0.99
AVT6	V	complement(399496,,400842)	0.00987	1.01	0.97
VHR2	V	complement(282705,,284222)	0.00971	1.01	0.97
GIP2	V	complement(262052,,263698)	0.0088	1.01	0.96
VAC8	V	128825,,130561	0.00647	1	0.97
TIR1	V	175248,,176012	0.00646	1	0.97
PEA2	V	complement(466208,,467470)	0.00395	1	0.99
PRS2	V	complement(358105,,359061)	0.00244	1	0.99
MET6	V	complement(339864,,342167)	0.00182	1	0.99
AIM9	V	319963,,321846	0.00141	1	0.99
NOP16	V	156803,,157498	0.000905	1	1
BEM2	V	complement(476345,,482848)	0.000219	1	1
ERG28	V	complement(237570,,238016)	0.000215	1	1
THO1	V	281710,,282366	-0.000573	-1	1
SAP1	V	complement(243810,,246503)	-0.00131	-1	0.99
YER076C	V	complement(312590,,313498)	-0.0027	-1	1
FAU1	V	complement(553334,,553969)	-0.00287	-1	0.99
NSA2	V	complement(413394,,414179)	-0.00298	-1	0.99
YEF1	V	75944,,77431	-0.00363	-1	0.99
GRX4	V	complement(538434,,539168)	-0.00426	-1	0.99
DNF1	V	512744,,517459	-0.00461	-1	0.98
CHZ1	V	213437,,213898	-0.01	-1.01	0.97
COX15	V	453459,,454919	-0.01	-1.01	0.95
GLO3	V	complement(402871,,404352)	-0.01	-1.01	0.95
DOT6	V	complement(333176,,335188)	-0.01	-1.01	0.96
POL5	V	complement(48471,,51539)	-0.02	-1.02	0.9
SEC3	V	complement(167808,,171818)	-0.02	-1.02	0.89
UBP5	V	complement(457806,,460223)	-0.02	-1.02	0.89
YER152C	V	complement(472657,,473988)	-0.02	-1.01	0.94
SCC4	V	complement(462968,,464842)	-0.02	-1.01	0.94
TOG1	V	complement(556296,,558680)	-0.02	-1.01	0.94
SBH2	V	complement(194273,,194539)	-0.02	-1.01	0.92
GPA2	V	195168,,196517	-0.03	-1.02	0.89
EMP65	V	451565,,453235	-0.03	-1.02	0.92
YEL043W	V	70478,,73348	-0.03	-1.02	0.88
OXA1	V	475020,,476228	-0.03	-1.02	0.91
SPT2	V	complement(499347,,500348)	-0.03	-1.02	0.88
MAK10	V	complement(53901,,56102)	-0.03	-1.02	0.9
SPO73	V	243180,,243611	-0.03	-1.02	0.93
HPA3	V	26667,,27206	-0.03	-1.02	0.96
GCD11	V	205251,,206834	-0.04	-1.03	0.85
FCY2	V	complement(266512,,268113)	-0.04	-1.03	0.83
RIP1	V	107260,,107907	-0.04	-1.03	0.81
HOM3	V	complement(256375,,257958)	-0.04	-1.03	0.82
LCP5	V	414481,,415554	-0.04	-1.03	0.83
MEI4	V	complement(238460,,239774)	-0.04	-1.03	0.82
RSM18	V	complement(253971,,254387)	-0.04	-1.03	0.89
ICL1	V	complement(285241,,286914)	-0.04	-1.03	0.85
YER079W	V	318920,,319552	-0.05	-1.04	0.78
JHD1	V	254656,,256134	-0.05	-1.04	0.83
FIR1	V	215063,,217693	-0.05	-1.04	0.88
RAD3	V	527082,,529418	-0.05	-1.03	0.83
UBC6	V	359562,,360314	-0.05	-1.03	0.83
MIG3	V	complement(210692,,211876)	-0.05	-1.03	0.92
IRC22	V	complement(150301,,150978)	-0.06	-1.04	0.85
UTR2	V	78053,,79456	-0.06	-1.04	0.86
SNU13	V	101943,,102323	-0.06	-1.04	0.8
GLE2	V	complement(373448,,374545)	-0.06	-1.04	0.78
COM2	V	complement(421115,,422446)	-0.06	-1.04	0.84
TSC11	V	complement(343320,,347612)	-0.06	-1.04	0.74
EDC3	V	126629,,128284	-0.07	-1.05	0.73
ZRG8	V	complement(218057,,221287)	-0.07	-1.05	0.76
VMA8	V	58378,,59148	-0.07	-1.05	0.77
BCK2	V	518216,,520771	-0.07	-1.05	0.82
YEA4	V	146951,,147979	-0.07	-1.05	0.9
CEM1	V	complement(278298,,279626)	-0.07	-1.05	0.76
LSM5	V	462585,,462866	-0.07	-1.05	0.88
COG3	V	484788,,487193	-0.07	-1.05	0.77
MCM3	V	86937,,89852	-0.08	-1.06	0.8
CYC7	V	complement(79636,,79977)	-0.08	-1.06	0.7
YPT31	V	complement(214076,,214747)	-0.08	-1.06	0.78
CAJ1	V	complement(246982,,248157)	-0.08	-1.06	0.7
PIC2	V	complement(258737,,259639)	-0.08	-1.06	0.77
IES5	V	342855,,343232	-0.08	-1.05	0.84
RPH1	V	523369,,525759	-0.08	-1.05	0.81
GLY1	V	complement(67629,,68792)	-0.08	-1.05	0.64
UTR4	V	80462,,81145	-0.08	-1.05	0.74
ILV1	V	328477,,330207	-0.08	-1.05	0.71
ECM32	V	541690,,545055	-0.09	-1.07	0.59
TRP2	V	337949,,339472	-0.09	-1.06	0.76
MIT1	V	141892,,143892	-0.09	-1.06	0.7
SBH1	V	complement(332582,,332830)	-0.09	-1.06	0.87
ECM10	V	94644,,96578	-0.09	-1.06	0.72
UBP3	V	complement(469686,,472424)	-0.09	-1.06	0.76
VTC1	V	302806,,303195	-0.09	-1.06	0.78
YER187W	V	566230,,566655	-0.1	-1.08	0.88
FLO8	V	complement(375215,,377614)	-0.1	-1.07	0.72
SPT15	V	465303,,466025	-0.1	-1.07	0.68
YER077C	V	complement(314534,,316600)	-0.1	-1.07	0.74
YEL023C	V	complement(108504,,110552)	-0.11	-1.08	0.58
YER158C	V	complement(488857,,490578)	-0.11	-1.08	0.58
RML2	V	complement(59670,,60851)	-0.11	-1.08	0.73
ARG5,6	V	295410,,298001	-0.11	-1.08	0.62
PRP22	V	178841,,182278	-0.11	-1.08	0.63
HAT2	V	47168,,48373	-0.11	-1.08	0.71
NUG1	V	162723,,164285	-0.12	-1.09	0.57
TMN3	V	complement(387932,,390052)	-0.12	-1.09	0.67
PCM1	V	43252,,44925	-0.12	-1.09	0.54
PTC2	V	complement(335946,,337340)	-0.12	-1.09	0.59
DSE1	V	complement(407342,,409063)	-0.12	-1.08	0.68
PMD1	V	complement(425188,,430449)	-0.13	-1.1	0.45
EAF5	V	121471,,122310	-0.13	-1.09	0.74
SAH1	V	complement(235770,,237119)	-0.13	-1.09	0.52
ICP55	V	complement(316807,,318342)	-0.13	-1.09	0.69
YER088C-A	V	complement(335696,,336019)	-0.13	-1.09	0.92
HXT13	V	complement(21537,,23231)	-0.14	-1.1	0.9
FCY22	V	276572,,278164	-0.14	-1.1	0.9
SPC25	V	complement(191959,,192624)	-0.14	-1.1	0.62
TPA1	V	251728,,253662	-0.14	-1.1	0.62
SMB1	V	complement(212587,,213177)	-0.14	-1.1	0.75
GTT3	V	123657,,124670	-0.14	-1.1	0.75
CHD1	V	505392,,509798	-0.14	-1.1	0.53
SPF1	V	90258,,93905	-0.15	-1.11	0.47
ISD11	V	250718,,251002	-0.16	-1.12	0.71
CHO1	V	complement(207644,,208474)	-0.17	-1.12	0.57
LSM4	V	387232,,387795	-0.17	-1.12	0.58
YER134C	V	complement(437267,,437803)	-0.17	-1.12	0.77
ANP1	V	complement(83050,,84552)	-0.18	-1.14	0.44
BIM1	V	188277,,189311	-0.18	-1.14	0.55
PET122	V	complement(474041,,474805)	-0.18	-1.13	0.55
PCL6	V	272624,,273886	-0.18	-1.13	0.56
CAN1	V	complement(31694,,33466)	-0.18	-1.13	0.57
YER034W	V	221846,,222403	-0.19	-1.14	0.59
AVT2	V	complement(29797,,31239)	-0.19	-1.14	0.52
UTP7	V	complement(324272,,325936)	-0.2	-1.15	0.4
IES6	V	69757,,70257	-0.2	-1.14	0.48
BUR6	V	complement(491530,,491958)	-0.21	-1.16	0.51
RPL23B	V	396769,,397653	-0.21	-1.16	0.42
PUG1	V	559454,,560365	-0.23	-1.18	0.81
FMP10	V	552525,,553259	-0.24	-1.18	0.44
YER085C	V	complement(327619,,328140)	-0.24	-1.18	0.76
TIM9	V	117211,,117474	-0.26	-1.2	0.74
GAL83	V	complement(208979,,210232)	-0.26	-1.2	0.33
NPP2	V	complement(124737,,126218)	-0.28	-1.21	0.43
YER038W-A	V	228451,,228831	-0.29	-1.23	0.81
AIM11	V	complement(347912,,348400)	-0.31	-1.24	0.64
GLN3	V	229795,,231987	-0.32	-1.25	0.32
YEN1	V	232461,,234740	-0.32	-1.24	0.37
DMC1	V	548421,,549517	-0.35	-1.27	0.21
BUD16	V	complement(96858,,97796)	-0.37	-1.29	0.5
ISC1	V	192797,,194230	-0.37	-1.29	0.29
ALD5	V	304030,,305592	-0.37	-1.29	0.32
AIM10	V	330576,,332306	-0.38	-1.3	0.37
SLO1	V	complement(550865,,551122)	-0.39	-1.31	0.74
YER181C	V	complement(551473,,551796)	-0.39	-1.31	0.74
YER137C	V	complement(441373,,441819)	-0.4	-1.32	0.64
YEL028W	V	98668,,99129	-0.45	-1.36	0.67
YEL020C-B	V	complement(117183,,117380)	-0.61	-1.52	0.75
YEL008W	V	140512,,140892	-0.61	-1.52	0.75
YER087C-A	V	complement(331817,,332368)	-0.61	-1.52	0.75
YER119C-A	V	complement(400867,,401238)	-0.61	-1.52	0.75
SOM1	V	complement(42400,,42624)	-0.66	-1.58	0.67
YER138C	V	complement(443756,,449024)	-0.7	-1.63	0.57
HYP2	V	85676..86149	-2.33321	-5.03927	0
YER148W-A	V	466185..466763	-3.08314	-8.47455	9.50834e-05
YFL064C	VI	complement(3322,,3846)	2.1	4.3	0.22
HXT10	VI	112345,,113985	1.04	2.06	0.44
YFL013W-A	VI	107799,,108602	0.87	1.83	0.13
COS4	VI	6426,,7565	0.57	1.48	0.23
RRT5	VI	complement(222090,,222959)	0.57	1.48	0.08
SNO3	VI	complement(10301,,10969)	0.55	1.46	0.51
IGD1	VI	complement(182274,,182861)	0.46	1.37	0.1
YFL012W	VI	110647,,111093	0.43	1.35	0.32
YFL040W	VI	51350,,52972	0.41	1.33	0.58
GNA1	VI	complement(103983,,104462)	0.36	1.29	0.3
SNZ3	VI	11363,,12259	0.34	1.27	0.65
HXK1	VI	complement(253592,,255049)	0.33	1.26	0.31
ROG3	VI	196833,,199034	0.31	1.24	0.44
HSP12	VI	107256,,107585	0.3	1.23	0.35
PAU5	VI	complement(99231,,99599)	0.27	1.2	0.75
YFR052C-A	VI	complement(253429,,253734)	0.26	1.2	0.41
YFR056C	VI	complement(263957,,264325)	0.25	1.19	0.88
OTU1	VI	complement(44655,,45560)	0.23	1.17	0.34
BLM10	VI	123479,,129910	0.21	1.16	0.46
YFH7	VI	159299,,160360	0.21	1.16	0.75
LPD1	VI	complement(101628,,103127)	0.2	1.15	0.41
IRC7	VI	264204,,265226	0.18	1.13	0.47
AAD6	VI	complement(14793,,15431)	0.18	1.13	0.46
MET10	VI	213312,,216419	0.18	1.13	0.44
HIS2	VI	complement(203743,,204750)	0.17	1.13	0.56
LOC1	VI	149110,,149724	0.17	1.13	0.64
IRC6	VI	complement(239114,,239827)	0.16	1.11	0.58
UBP6	VI	165067,,166566	0.16	1.12	0.43
RPN12	VI	252505,,253329	0.15	1.11	0.41
FAR7	VI	160535,,161200	0.15	1.11	0.63
YMR31	VI	248523,,248894	0.14	1.1	0.53
PRE4	VI	complement(249066,,249866)	0.13	1.09	0.51
GSY1	VI	complement(174265,,176391)	0.13	1.09	0.55
YFL052W	VI	28232,,29629	0.13	1.09	0.6
MSH4	VI	complement(134521,,137157)	0.13	1.09	0.57
YFR020W	VI	192737,,193435	0.13	1.09	0.61
NIC96	VI	150016,,152535	0.12	1.09	0.56
YFR045W	VI	241998,,242999	0.12	1.09	0.71
AGP3	VI	17004,,18680	0.12	1.09	0.8
RET2	VI	complement(250163,,251803)	0.11	1.08	0.6
GAT1	VI	95966,,97498	0.11	1.08	0.7
CDC14	VI	complement(208413,,210068)	0.1	1.07	0.56
AGX1	VI	76831,,77988	0.1	1.07	0.65
KEG1	VI	238458,,239060	0.1	1.07	0.78
BST1	VI	complement(84145,,87234)	0.1	1.07	0.75
DEG1	VI	147131,,148459	0.09	1.06	0.8
VTC2	VI	131810,,134296	0.09	1.06	0.78
SAP155	VI	234242,,237250	0.09	1.07	0.67
YFL066C	VI	complement(1437,,2615)	0.09	1.07	0.74
DUG1	VI	complement(239992,,241437)	0.09	1.07	0.76
FMP32	VI	42815,,43438	0.08	1.06	0.79
YPT1	VI	complement(55366,,55986)	0.08	1.06	0.68
SEC53	VI	complement(43628,,44392)	0.07	1.05	0.69
AAD16	VI	complement(14305,,14763)	0.07	1.05	0.82
SMC1	VI	119429,,123106	0.06	1.04	0.77
LSB3	VI	complement(201960,,203433)	0.06	1.04	0.84
YFL054C	VI	complement(20847,,22787)	0.06	1.04	0.78
FET5	VI	49139,,51007	0.06	1.05	0.76
BNA6	VI	complement(244279,,245166)	0.05	1.03	0.82
SEC4	VI	130334,,130981	0.05	1.03	0.83
TUB2	VI	56336,,57709	0.04	1.03	0.84
PTR3	VI	210937,,212973	0.04	1.03	0.85
RPL22B	VI	complement(64243,,64932)	0.04	1.03	0.93
YFR016C	VI	complement(177042,,180743)	0.04	1.03	0.81
RPN11	VI	153393,,154313	0.04	1.03	0.83
SMC2	VI	complement(216594,,220106)	0.03	1.02	0.88
GCN20	VI	162488,,164746	0.03	1.02	0.88
PHO4	VI	complement(225020,,225958)	0.02	1.01	0.92
HAC1	VI	75179,,76147	0.01	1.01	0.96
SWP82	VI	36803,,38674	0.01	1.01	0.95
FAB1	VI	184502,,191338	0.01	1.01	0.95
YFL021C-A	VI	complement(95761,,96615)	0.01	1.01	0.99
ACT1	VI	complement(53260,,54696)	0.01	1.01	0.96
RGD2	VI	40421,,42565	0.00982	1.01	0.97
YPI1	VI	complement(152657,,153124)	0.00336	1	0.99
ALR2	VI	complement(33272,,35848)	0.00296	1	0.99
[truncated: 3,883 more rows]
